# Supplementary material for: Validation of a pregnancy planning measure for Arabic-speaking women
Source: PubMed Central journal article supplement (PMC5653179; doi:10.1371/journal.pone.0185433), 2017-10-23
Supplement: pone.0185433.s002.pdf [file pone.0185433.s002.pdf]

## الظروف المحيطة بالحمل

ادناه بعض الأسئلة حول الظروف المحيطة بالحمل وشعورك بتوقيت حدوث الحمل. نرجو وضع الحمل الحالي (أو آخر حمل) بالاعتبار عند الإجابة على الأسئلة.  
**الرجاء اختيار العبارة الأنسب في كل من الأسئلة التالية:**

1 ( في الشهر الذي أصبحت به حاملا، انا وشريكي ...

- لم نستخدم مانع للحمل
- كنا نستخدم مانع للحمل، لكن ليس في كل الممارسات الحميمية.
- دائما نستخدم مانع للحمل، لكنني أعلم ان المانع فشل (تشقق، تحرك من مكانه، انخلع عن مكانه، لم يعمل، إلخ)
- دائما نستخدم مانع للحمل

2 ( أشعر أن حدوث حملي كان .....

- في الوقت المناسب
- جيد، لكنه ليس في الوقت المناسب تماما
- في وقت غير مناسب

3 ( تماما قبل حدوث الحمل

- كنت أنوي أن أحمل
- نيتي بالحمل كانت متذبذبة
- لم أكن أنوي أن أحمل

4 ( تماما قبل حدوث الحمل

- كنت أرغب أن أرزق بطفل
- كانت لدي مشاعر مختلطة بأن أرزق بطفل
- لم أكن أرغب أن أرزق بطفل

في السؤال التالي، المتعلق حول شريكك- ...

5 ( قبل حدوث الحمل

- أنا وشريكي كنا متفقين على أن أصبح حاملا
- أنا وشريكي تناقشنا على أن ننجب أطفالا ما بيننا، ولكن لم أوافق أن أصبح حاملا
- لم نناقش مطلقا أن ننجب أطفالا فيما بيننا

6 ( قبل حدوث الحمل، هل قمتي بأي شيء لتحسين صحتك لتهيئتك للحمل؟

(الرجاء اختيار كل ما هو مناسب من العبارات)

- أخذت حمض الفوليك
- توقفت أو قللت من التدخين، المعسل، او الشيشة
- توقف زوجي عن التدخين بوجودي او داخل المنزل
- أكلي أصبح صحيا أكثر.

بحثت عن نصائح صحية/طبية

اتخذت إجراء آخر، الرجاء الشرح

أو

لم أفعل أي مما تم ذكره أعلاه قبل حملي.
