# Supplementary material for: Validation of a pregnancy planning measure for Arabic-speaking women
Source: PubMed Central journal article supplement (PMC5653179; doi:10.1371/journal.pone.0185433), 2017-10-23
Supplement: pone.0185433.s003.pdf [file pone.0185433.s003.pdf]

### **Circumstances around pregnancy**

**Below some questions about the circumstances surrounding the pregnancy and the time you felt about it. Please put the current pregnant or the last one (Choose the most appropriate phrase)**

**11. In the month in which I became pregnant me and my partner...**

- we didn't use contraception
- we have been using contraceptives but not at all intimate practices.
- we always use contraceptives but I know it failed (crackling, moved from his place , dislocated from his place , it doesn't work , etc..)
- we always use contraception

**12. I feel that my pregnancy was happening...**

- In the suitable time
- good , but not in suitable time
- not suitable time

**13. Completely before pregnancy**

- I intend to be pregnant
- my intention was unsteady
- I didn't intend to be pregnant

**14. Completely before pregnancy**

- I wanted to have a baby
- I had mixed feelings to have a baby
- I didn't want to have a baby

**15. Before the pregnancy....**

- Me and my partner were agreed to become pregnant
- we discussed to have children but , I didn't agree
- we didn't discuss this issue

**16. Before your pregnancy did you do anything to improve your health to prepare you ?**

- I took Folic acid

Eman Almaghaslah

- I stopped or reduced smoking
- My husband stopped smoking when I'm inside the house
- My Meals become healthier
- I searched for medical and health advices
- I didn't do anything from what is written above
- Other (please specify)

Thank you for filling the questionnaire, please refill this next week (after 7 days) if possible for once.
