# Supplementary material for: Validation of a pregnancy planning measure for Arabic-speaking women
Source: PLoS One. 2017 Oct 23;12(10):e0185433. doi: 10.1371/journal.pone.0185433 (PMC5653179; doi:10.1371/journal.pone.0185433)
Supplement: S1 Table — *for clear up-to-date reference with specific modifications, see survey websites, as this information is beyond this study’s purpose. (PDF) [file pone.0185433.s001.pdf]

| Year                                               | Question                                                                                                                                                                  | Categories                                                                                                  | Interpretation                |
|----------------------------------------------------|---------------------------------------------------------------------------------------------------------------------------------------------------------------------------|-------------------------------------------------------------------------------------------------------------|-------------------------------|
| <b>National survey of family growth (NSFG) [3]</b> |                                                                                                                                                                           |                                                                                                             |                               |
| 1973-2016                                          | 1- Before you became pregnant . . . had you stopped using all methods of birth control?                                                                                   | 1- Yes, No<br><br>(If Yes, go to 2;<br>If No, if no go to 3)                                                |                               |
|                                                    | 2- Was the reason you had stopped using any methods because you yourself wanted to become pregnant?                                                                       | 2- Yes, No, I don't know (If yes, go to 5; If No, go to 6; If I don't know, go to 4)                        |                               |
|                                                    | 3- At the time you became pregnant . . . did you yourself actually want to have a(nother) baby at some time?                                                              | 3- Yes, No                                                                                                  | 3-Yes= Wanted<br>No= Unwanted |
|                                                    | 4- It is sometimes difficult to recall these things, but just before that pregnancy began, would you say you probably wanted a(nother) baby at some time or probably not? | 4- Probably yes, Probably no, Didn't care (If probably yes, go to5; if probably no or didn't care, go to 6) | 4- Probably no = Unwanted     |
|                                                    | 5- Did you become pregnant sooner than you wanted, later than you wanted, or at about the right time?                                                                     | 5- Sooner, Later, Right time, or Didn't care                                                                | 5- Sooner= Mistimed           |

|                                                                           |                                                                                                                                                                                     |                                                                                                     |                                         |
|---------------------------------------------------------------------------|-------------------------------------------------------------------------------------------------------------------------------------------------------------------------------------|-----------------------------------------------------------------------------------------------------|-----------------------------------------|
| 1995-2016                                                                 | 6- Happiness measurement: asked the respondent who happy show was when she know she was pregnant                                                                                    | 6- A 10-point scale ranging from very happy to very unhappy                                         | -Right time, later, didn't care= Wanted |
|                                                                           | 7- Ambivalent measurement: asked the respondent about her feelings around here pregnancy: e.g.                                                                                      | 7- A 10-point scale ranging from strongly agree to strongly disagree e.g. Strongly agree            | 7- Maximum ambivalence                  |
| <b>Demographic and health survey (DHS) [10] in more than 90 countries</b> |                                                                                                                                                                                     |                                                                                                     |                                         |
| 1948-2016                                                                 | "At the time, you became pregnant with [name of last-born child], did you want to become pregnant then, did you want to wait until later, or did you want no more children at all?" | "I wanted to get pregnant then"                                                                     | Intended                                |
|                                                                           |                                                                                                                                                                                     | "I wanted to get pregnant later"                                                                    | Mistimed                                |
|                                                                           |                                                                                                                                                                                     | "I did not want any more children"                                                                  | Unwanted                                |
| <b>Pregnancy Risk Monitoring Assessment System (PRAMS) by CDC [10]</b>    |                                                                                                                                                                                     |                                                                                                     |                                         |
| 1987-2016                                                                 | "Thinking back to just before you got pregnant, how did you feel about getting pregnant?"                                                                                           | "I didn't want to be pregnant then or at any time in the future, or I wanted to be pregnant later." | Unintended                              |
|                                                                           |                                                                                                                                                                                     | "I wanted to be pregnant, sooner, or I wanted to be pregnant then"                                  | Intended                                |
| <b>Cross-sectional survey data from Indonesia [10]</b>                    |                                                                                                                                                                                     |                                                                                                     |                                         |
| 1996                                                                      | "Ever experience unintended pregnancy"                                                                                                                                              | "Subjective (respondent report)"                                                                    | Ever vs. never had unintended pregnancy |
| <b>Contraceptive Use, Pregnancy Intention and Decisions (CUPID) [17]</b>  |                                                                                                                                                                                     |                                                                                                     |                                         |
| 2011-2014                                                                 | "Have you ever become pregnant by accident?"                                                                                                                                        | Yes                                                                                                 | Unintended                              |
