# Supplementary material for: Validation of a pregnancy planning measure for Arabic-speaking women
Source: PLoS One. 2017 Oct 23;12(10):e0185433. doi: 10.1371/journal.pone.0185433 (PMC5653179; doi:10.1371/journal.pone.0185433)
Supplement: S4 File — (XLSX) [file pone.0185433.s005.xlsx]

## Sheet: Total
ID	ID2	Age	Level of education	Regions	Urban/Rural	No. of pregnancies	No. of children	Age of the last child	Pregnant	M_pregnant	Nuersing?	Contraceptive use	Timing	Intention	Desire for motherhood	Partner	Folic Acid	Smoke	Prtner_smk	Diet	Med_info	Prep_none	Other	Total prep	corrected prep	LMUP score	Column4
6090272483	153357312	40	Bachelor	الرياض	Urban	8	6	7	N	2	N	2	2	2	2	2						0		#REF!	0	10
6090272176	153357312	37	Bachelor	الرياض	Urban	2	2	8	N		N	2	2	2	2	2	1			1	1			#REF!	2	12
6090266724	153357312	39	Bachelor	الرياض	Urban	4	4	3	N		N	2	2	2	2	2	1			1				#REF!	2	12
6090262504	153357312	33	Bachelor	الرياض	Urban	1	0	1	N		N													#REF!	0
6090250443	153357312	45	Post graduate	الرياض	Urban	3	3	11	N		N	2	2	2	2	0	1							#REF!	1	9
6090234034	153357312	34	Diploma	المنطقة الشرقية	Rural	4	4	3	N		N	0	0	0	0	1						0		#REF!	0	1
6089724932	153357312	28	Bachelor	المنطقة الشرقية	Urban	1	1	2	N		N	2	2	2	2	2						0		#REF!	0	10
6089721909	153357312	33	Bachelor	المنطقة الشرقية	Urban	3	3	0.0833333	y		y	2	2	1	2	1					1			#REF!	1	9
6089640524	153357312	27	Bachelor	المنطقة الشرقية	Urban	4	3	4	N		N	1	0	0	0	1						0		#REF!	0	2
6089632111	153357312	45	Diploma	المنطقة الشرقية	Urban	5	5	12	N		N													#REF!	0
6089627559	153357312	29	Bachelor	المنطقة الشرقية	Rural	4	2	3	N		N	1	1	0	1	1						0		#REF!	0	4
6089467670	153357312	31	Diploma	المنطقة الشرقية	Urban	1	1	0.0833333	y		y	2	2	2	2	2					1			#REF!	1	11
6089458639	153357312	31	Diploma	المنطقة الشرقية	Urban	1	1	0.0833333	y		y													#REF!	0
6089457598	153357312	34	Diploma	المنطقة الشرقية	Rural	1	1	0.416667	y		y	2	2	2	1	2			1					#REF!	1	10
6089319461	153357312	26	Bachelor	مكة المكرمة	Urban	1	1	1	N		N	2	2	2	2	2					1			#REF!	1	11
6089210983	153357312	25	Diploma	المنطقة الشرقية	Urban	1	1	1.58333	N		N	2	1	1	1	1						0		#REF!	0	6
6089178288	153357312	42	Bachelor	المنطقة الشرقية	Rural	4	4	12	N		N	1	1	0	0	0						0		#REF!	0	2
6089138473	153357312	31	Secondary school	المنطقة الشرقية	Urban	4	4	2.41667	N		N	1	0	0	0	0						0		#REF!	0	1
6089105929	153357312	31	Bachelor	المنطقة الشرقية	Urban	2	1	1.16667	N	5	N	0	0	0	0	1	1							#REF!	1	2
6089100029	153357312	30	Diploma	المنطقة الشرقية	Urban	4	3	0.75	y		y	2	2	2	2	2	1							#REF!	1	11
6089098175	153357312	25	Diploma	المنطقة الشرقية	Rural	4	3	2.66667	N	9	N	1	1	2	1	1						0		#REF!	0	6
6089070994	153357312	28	Diploma	المنطقة الشرقية	Rural	2	2	1.66667	N		N	1	1	0	0	0						0		#REF!	0	2
6089058815	153357312	26	Secondary school	المنطقة الشرقية	Urban	4	2	4	y		y	2	1	1	1	1						0		#REF!	0	6
6089054215	153357312	39	Diploma	المنطقة الشرقية	Urban	8	5	19/12	N	6	N	1	0	0	0	1						0		#REF!	0	2
6089052038	153357312	25	Bachelor	المنطقة الشرقية	Urban	1	1	4	N		N	2	1	1	1	1	1							#REF!	1	7
6089039931	153357312	33	Bachelor	المنطقة الشرقية	Urban	1	1	0.109589	y		y	2	2	2	2	2							1	#REF!	1	11
6089008600	153357312	35	Bachelor	المنطقة الشرقية	Urban	4	3	5	N		N	2	0	0	0	1						0		#REF!	0	3
6088995817	153357312	34	Bachelor	المنطقة الشرقية	Rural	3	3	3	N		N	1	1	0	0	0						0		#REF!	0	2
6088995561	153357312	46	Bachelor	المنطقة الشرقية	Urban	4	4	7	N		N	0	2	0	2	2	1			1	1			#REF!	2	8
6088995343	153357312	38	Bachelor	المنطقة الشرقية	Urban	5	4	5	N		N	1	1	0	1	0				1				#REF!	1	4
6088993491	153357312	30	Diploma	المنطقة الشرقية	Rural	1	1	3	N		N	2	2	2	2	2						0		#REF!	0	10
6088992339	153357312	27	Bachelor	المنطقة الشرقية	Urban	1	1	3	N		N	2	2	2	1	2						0		#REF!	0	9
6088988021	153357312	32	Secondary school	المنطقة الشرقية	Urban	2	2	0.25	y		y	2	2	2	2	2							1	#REF!	1	11
6088982499	153357312	23	Secondary school	المنطقة الشرقية	Rural	3	2	1	y		y	0	1	1	1	0						0		#REF!	0	3
6088974040	153357312	31	Bachelor	المنطقة الشرقية	Rural	2	2	4	N		N	2	2	2	2	2	1			1	1			#REF!	2	12
6088973018	153357312	37	Bachelor	المنطقة الشرقية	Urban	4	3	9	N		N	2	2	2	2	2				1				#REF!	1	11
6088971663	153357312	36	Bachelor	المنطقة الشرقية	Urban	4	2	7	y	6	y	2	2	2	2	2					1			#REF!	1	11
6088971468	153357312	37	Bachelor	المنطقة الشرقية	Urban	4	3	5	N		N													#REF!	0
6088970975	153357312	39	Post graduate	المنطقة الشرقية	Urban	3	3	3	N		N	2	2	2	2	2						0		#REF!	0	10
6088968962	153357312	39	Post graduate	المنطقة الشرقية	Urban	3	3	9	N		N	2	2	2	2	2					1			#REF!	1	11
6088966507	153357312	30	Secondary school	المنطقة الشرقية	Rural	3	3	2.25	N		N	1	2	1	2	0						0		#REF!	0	6
6088966062	153357312	26	Bachelor	المنطقة الشرقية	Urban	2	2	2	N		N													#REF!	0
6088962290	153357312	24	Bachelor	المنطقة الشرقية	Urban	1	0	-	N	3	N	2	1	0	2	1						0		#REF!	0	6
6088958137	153357312	32	Bachelor	المنطقة الشرقية	Rural	2	2	3	N		N	2	2	2	2	2					1			#REF!	1	11
6088951117	153357312	27	Bachelor	المنطقة الشرقية	Urban	2	2	1.5	N		N	2	1	0	0	1						0		#REF!	0	4
6088945160	153357312	33	Bachelor	المنطقة الشرقية	Urban	4	2	2	N	4	N	2	2	2	1	2	1							#REF!	1	10
6088940695	153357312	30	Bachelor	المنطقة الشرقية	Urban	2	2	1.5	N		N	2	2	2	2	2	1			1	1			#REF!	2	12
6088936268	153357312	24	Bachelor	المنطقة الشرقية	Urban	1	1	0.123288	y		y	2	2	2	2	2	1			1	1			#REF!	2	12
6088932713	153357312	29	Secondary school	المنطقة الشرقية	Urban	3	2	0.75	N		N	1	2	2	1	2						0		#REF!	0	8
6088928033	153357312	20	Secondary school	المنطقة الشرقية	Urban	2	1	2	N	5	N													#REF!	0
6088789160	153357312	33	Bachelor	المنطقة الشرقية	Urban	2	2	0.166667	y		y	2	2	2	2	2					1			#REF!	1	11
6088749115	153357312	27	Bachelor	المنطقة الشرقية	Urban	1	1	2	N		N	2	2	2	2	2						0		#REF!	0	10
6088719251	153357312	44	Bachelor	المنطقة الشرقية	Urban	6	6	2.58333	N		N	1	1	1	1	1						0		#REF!	0	5
6088678349	153357312	28	Bachelor	المنطقة الشرقية	Urban	2	2	2	N		N	2	2	2	2	2						0		#REF!	0	10
6088654149	153357312	44	Secondary school	المنطقة الشرقية	Rural	5	4	1.5	y		y													#REF!	0
6088642089	153357312	19	Bachelor	المنطقة الشرقية	Urban	0	0	0	N		N													#REF!	0
6088623175	153357312	37	Secondary school	المنطقة الشرقية	Urban	7	6	0.0191781	y		y	1	1	0	1	1				1	1			#REF!	2	6
6088601905	153357312	41	Diploma	المنطقة الشرقية	Urban	4	4	3	N		N	2	2	0	0	1						0		#REF!	0	5
6088592282	153357312	49	Diploma	الرياض	Rural	6	6	17	N		N	2	2	0	2	2						0		#REF!	0	8
6088579706	153357312	34	Bachelor	المنطقة الشرقية	Urban	3	5	2.5	N		N	1	1	1	1	2	1							#REF!	1	7
6088573650	153357312	25	Bachelor	المنطقة الشرقية	Rural	1	1	3	N		N	2	1	1	1	2						0		#REF!	0	7
6088556935	153357312	43	Secondary school	المنطقة الشرقية	Urban	7	6	1	y		y	1	1	0	1	0						0		#REF!	0	3
6088531751	153357312	37	Post graduate	الرياض	Urban	2	2	9	N		N	2	1	1	1	0				1				#REF!	1	6
6088500844	153357312	30	Secondary school	المنطقة الشرقية	Rural	4	4	0.0410959	y		y	1	0	0	0	0						0		#REF!	0	1
6088499004	153357312	30	Diploma	المنطقة الشرقية	Urban	3	3	1.25	N		N	1	1	0	1	0						0		#REF!	0	3
6088460131	153357312	46	Primary school	المنطقة الشرقية	Urban	5	5	13	N		N	2	1	2	2	2						0		#REF!	0	9
6088448480	153357312	32	Bachelor	المنطقة الشرقية	Rural	3	1	4	N	6	N	2	2	2	2	2	1							#REF!	1	11
6088445812	153357312	30	Secondary school	المنطقة الشرقية	Rural	1	1	2.5	N		N	1	1	2	2	2						0		#REF!	0	8
6088427614	153357312	25	Bachelor	المنطقة الشرقية	Urban	2	1	6	N	5	N	2	2	2	2	2				1				#REF!	1	11
6088392568	153357312	20	Bachelor	الرياض	Urban	2	2	1	N		N	2	2	2	2	2					1			#REF!	1	11
6088380522	153357312	38	Diploma	المنطقة الشرقية	Urban	4	4	1.5	N		N													#REF!	0
6088377639	153357312	20	Bachelor	الرياض	Urban	0	0	-	N		N	0	1	0	2	0					1			#REF!	1	4
6088376214	153357312	42	Bachelor	المنطقة الشرقية	Urban	4	4	3	N		N	0	1	0	0	1						0		#REF!	0	2
6088339531	153357312	43	Bachelor	المنطقة الشرقية	Rural	4	4	8	N		N	0	2	2	1	2						0		#REF!	0	7
6088255483	153357312	35	Diploma	المنطقة الشرقية	Urban	7	6	5	N		N	2	2	2	2	2	1							#REF!	1	11
6088235995	153357312	23	Bachelor	الباحة	Urban	2	1	2.41667	y	6	y	0	0	0	0	1						0		#REF!	0	1
6088198910	153357312	32	Bachelor	المنطقة الشرقية	Urban	2	2	6	N		N	2	2	2	2	2						0		#REF!	0	10
6088189804	153357312	42	Bachelor	المنطقة الشرقية	Urban	4	4	5	N		N	0	0	0	0	0						0		#REF!	0	0
6088181676	153357312	23	Bachelor	عسير	Urban	1	1	1	y		y	1	1	1	1	1						0		#REF!	0	5
6088170884	153357312	43	Secondary school	المنطقة الشرقية	Urban	7	7	7	N		N	1	0	0	0	0						0		#REF!	0	1
6088163975	153357312	21	Bachelor	عسير	Urban	1	0	0	N	8	N	1	1	1	1	2	1		1					#REF!	2	8
6088146452	153357312	24	Bachelor	المنطقة الشرقية	Urban	2	2	1.16667	y		y	2	0	0	0	0						0		#REF!	0	2
6088118421	153357312	34	Diploma	عسير	Rural	4	3	4	N		N	0	0	0	0	0						0		#REF!	0	0
6088116050	153357312	40	Bachelor	المنطقة الشرقية	Urban	8	5	5	N		N													#REF!	0
6088103289	153357312	30	Bachelor	الرياض	Urban	3	2	1.5	N		N	2	0	0	0	0						0		#REF!	0	2
6088093813	153357312	43	Diploma	المنطقة الشرقية	Urban	3	4	13	N		N	2	2	2	2	2	1							#REF!	1	11
6088091832	153357312	28	Diploma	عسير	Urban	1	0	0	N		N	2	2	2	2	2	1			1			1	#REF!	2	12
6088069078	153357312	25	Bachelor	المنطقة الشرقية	Urban	2	2	1.41667	N		N	2	2	1	1	2						0		#REF!	0	8
6088064830	153357312	26	Bachelor	عسير	Urban	3	2	0.0356164	y		y	2	2	2	2	2	1							#REF!	1	11
6088064753	153357312	50	Intermediate school	المنطقة الشرقية	Urban	8	8	15	N		N	1	0	0	2	1	1			1	1			#REF!	2	6
6088049914	153357312	25	Bachelor	عسير	Rural	1	1	2	N		N													#REF!	0
6088041219	153357312	31	Bachelor	عسير	Urban	2	0	-	N		N	2	0	2	2	2	1							#REF!	1	9
6088037729	153357312	22	Secondary school	عسير	Urban	2	2	0.0547945	y		y	2	2	2	2	2						0		#REF!	0	10
6088031365	153357312	34	Secondary school	عسير	Urban	3	2	1.66667	y		y	2	2	2	2	2						0		#REF!	0	10
6088007778	153357312	33	Post graduate	المنطقة الشرقية	Urban	6	4	0.666667	y		y	2	2	2	2	2				1				#REF!	1	11
6088007595	153357312	27	Post graduate	المنطقة الشرقية	Urban	1	1	4.5	N		N	2	2	0	2	0						0	1	#REF!	1	7
6088004088	153357312	20	Bachelor	المنطقة الشرقية	Urban	1	1	2.5	N		N	2	2	2	2	2						0		#REF!	0	10
6087997343	153357312	40	Bachelor	عسير	Rural	4	4	2	N		N	2	2	2	2	2	1							#REF!	1	11
6087996212	153357312	22	Bachelor	عسير	Urban	1	1	1	N		N	2	2	2	2	2	1			1				#REF!	2	12
6087994350	153357312	19	Bachelor	عسير	Urban	0	0	-	N		N													#REF!	0
6087981417	153357312	22	Bachelor	عسير	Urban	1	0	0	N	2	N	1	0	0	1	1						0		#REF!	0	3
6087978879	153357312	23	Bachelor	عسير	Urban	1	1	1.08333	N		N	1	2	1	1	0						0		#REF!	0	5
6087969711	153357312	22	Bachelor	عسير	Urban	1	1	1	N		N													#REF!	0
6087942762	153357312	23	Bachelor	عسير	Urban	0	0	-	N		N	1	1	0	0	1	1			1				#REF!	2	5
6087941635	153357312	23	Bachelor	عسير	Urban	0	0	-	N		N													#REF!	0
6087940337	153357312	25	Bachelor	عسير	Rural	1	1	0.416667	y		y	0	0	1	1	2				1	1			#REF!	2	6
6087895536	153357312	26	Bachelor	المنطقة الشرقية	Urban	1	1	0.25	y		y	2	2	2	2	2			1		1			#REF!	2	12
6087894553	153357312	27	Bachelor	المنطقة الشرقية	Urban	3	2	0.416667	y		y	2	2	2	2	2						0		#REF!	0	10
6087890502	153357312	32	Diploma	المنطقة الشرقية	Rural	5	4	0.0833333	y		y	2	2	2	2	2	1							#REF!	1	11
6087883469	153357312	23	Bachelor	المنطقة الشرقية	Urban	2	2	0.166667	y		y	2	0	0	0	1				1				#REF!	1	4
6087868325	153357312	33	Bachelor	المنطقة الشرقية	Rural	1	1	9	N		N	2	2	2	2	2						0		#REF!	0	10
6087859770	153357312	47	Secondary school	المنطقة الشرقية	Urban	7	5	16	N		N	2	1	1	2	1						0		#REF!	0	7
6087858509	153357312	41	Diploma	المنطقة الشرقية	Urban	5	3	11	N		N	2	0	2	2	2						0		#REF!	0	8
6087853046	153357312	31	Bachelor	المنطقة الشرقية	Urban	2	2	3	N		N	2	1	0	1	0						0		#REF!	0	4
6087852086	153357312	35	Bachelor	المنطقة الشرقية	Urban	4	4	1	y	3	y	1	0	0	0	0						0		#REF!	0	1
6087844786	153357312	37	Secondary school	المنطقة الشرقية	Urban	7	6	0.0191781	y		y													#REF!	0
6087834463	153357312	40	Secondary school	المنطقة الشرقية	Urban	4	4	6	N		N	2	2	2	2	2						0		#REF!	0	10
6087829457	153357312	31	Post graduate	المنطقة الشرقية	Urban	3	2	4	N		N	2	2	2	2	2	1			1				#REF!	2	12
6087828086	153357312	45	Post graduate	المنطقة الشرقية	Urban	5	4	10	N		N	2	0	0	0	0						0		#REF!	0	2
6087825065	153357312	37	Bachelor	المنطقة الشرقية	Urban	4	3	10	N	3	N	1	0	0	0	1							1	#REF!	1	3
6087816654	153357312	28	Bachelor	المنطقة الشرقية	Urban	1	1	2	N		N	2	2	2	2	2	1							#REF!	1	11
6087812378	153357312	31	Secondary school	المنطقة الشرقية	Rural	6	6	1.5	N	6	N	1	0	0	0	0						0		#REF!	0	1
6087807895	153357312	40	Diploma	المنطقة الشرقية	Rural	3	3	8	N		N	0	1	1	2	0						0		#REF!	0	4
6087795982	153357312	32	Bachelor	القصيم	Rural	2	2	5	N		N	2	2	2	2	0						0		#REF!	0	8
6087786576	153357312	27	Bachelor	المنطقة الشرقية	Urban	3	3	1	N		N	2	2	1	2	1	1							#REF!	1	9
6087778736	153357312	24	Secondary school	المنطقة الشرقية	Rural	1	1	1.41667	y		y	2	2	2	2	2						0		#REF!	0	10
6087770848	153357312	35	Secondary school	القصيم	Rural	7	6	2.5	N	6	N	1	1	1	1	1						0		#REF!	0	5
6087758493	153357312	42	Bachelor	المنطقة الشرقية	Urban	1	1	3	N		N	2	2	2	2	2						0		#REF!	0	10
6087754850	153357312	42	Bachelor	المنطقة الشرقية	Urban	1	1	3	N		N	2	2	2	2	2						0		#REF!	0	10
6087748691	153357312	23	Bachelor	القصيم	Urban	1	1	1	N		N	2	2	2	2	2	1				1			#REF!	2	12
6087744685	153357312	27	Secondary school	الرياض	Urban	1	0	0	N	3	N	2	2	2	2	2				1				#REF!	1	11
6087738384	153357312	49	Intermediate school	الرياض	Urban	7	7	10	N		N	2	1	2	2	2	1			1	1			#REF!	2	11
6087726471	153357312	40	Bachelor	المنطقة الشرقية	Urban	5	3	3	N		N	2	2	2	2	2	1				1			#REF!	2	12
6087712271	153357312	35	Post graduate	تبوك	Rural	3	3	4	N		N	2	1	1	1	0					1			#REF!	1	6
6087712229	153357312	38	Post graduate	مكة المكرمة	Urban	8	6	5	N		N	1	0	0	0	0						0		#REF!	0	1
6087711078	153357312	33	Post graduate	الرياض	Urban	2	2	1.58333	N		N	2	2	2	2	2							1	#REF!	1	11
6087710149	153357312	26	Bachelor	مكة المكرمة	Urban	2	2	5	N		N	2	2	2	2	2						0		#REF!	0	10
6087709261	153357312	42	Bachelor	المنطقة الشرقية	Urban	5	5	0.333333	y		y	1	0	0	0	1						0		#REF!	0	2
6087708806	153357312	30	Primary school	القصيم	Urban	3	3	3	N		N	2	2	2	2	2						0		#REF!	0	10
6087708183	153357312	37	Secondary school	المنطقة الشرقية	Urban	4	4	2.66667	N		N	1	2	0	0	1						0		#REF!	0	4
6087705940	153357312	37	Bachelor	المنطقة الشرقية	Urban	3	2	11	N		N	2	2	2	1	0	1							#REF!	1	8
6087703821	153357312	43	Post graduate	مكة المكرمة	Urban	16	8	9	N		N	2	1	1	1	2						0		#REF!	0	7
6087701659	153357312	36	Primary school	القصيم	Rural	6	4	3	N		N	2	2	2	2	2						0		#REF!	0	10
6087698993	153357312	37	Bachelor	المنطقة الشرقية	Urban	3	3	1.41667	y		y	2	2	2	2	2	1			1	1			#REF!	2	12
6087695558	153357312	41	Bachelor	المنطقة الشرقية	Urban	3	2	8	N		N	1	1	1	2	2						0		#REF!	0	7
6087693834	153357312	27	Bachelor	المنطقة الشرقية	Urban	3	2	2.75	N	3	N	2	1	2	2	2	1							#REF!	1	10
6087693474	153357312	35	Bachelor	المنطقة الشرقية	Rural	4	4	1	y		y	2	2	2	2	2				1				#REF!	1	11
6087692371	153357312	23	Secondary school	المنطقة الشرقية	Urban	0	0	-	N		N													#REF!	0
6087691533	153357312	43	Bachelor	المنطقة الشرقية	Rural	4	4	15	N		N	1	0	0	0	0						0		#REF!	0	1
6087688628	153357312	42	Bachelor	المنطقة الشرقية	Urban	5	4	4	N		N	2	2	2	2	2	1			1				#REF!	2	12
6087687875	153357312	26	Bachelor	المدينة المنورة	Urban	1	0	0	N	9	N	1	0	0	1	1						0		#REF!	0	3
6087687800	153357312	31	Post graduate	المنطقة الشرقية	Rural	4	3	3	N		N	1	2	1	1	2	1							#REF!	1	8
6087684626	153357312	34	Post graduate	الرياض	Urban	4	3	5	N		N	2	2	2	2	2	1							#REF!	1	11
6087679339	153357312	39	Bachelor	المنطقة الشرقية	Rural	3	3	2.5	N		N	2	1	2	2	2						0		#REF!	0	9
6087677791	153357312	35	Bachelor	المنطقة الشرقية	Urban	2	2	5	N		N													#REF!	0
6087676850	153357312	32	Bachelor	المنطقة الشرقية	Urban	5	4	1	N		N	1	1	1	1	1						0		#REF!	0	5
6087675356	153357312	25	Bachelor	المنطقة الشرقية	Urban	2	1	2	N	8	N	1	1	1	2	0	1							#REF!	1	6
6087675056	153357312	42	Intermediate school	المنطقة الشرقية	Urban	8	7	5	N		N	2	1	1	1	2						0		#REF!	0	7
6087672928	153357312	24	Secondary school	المنطقة الشرقية	Rural	3	2	3	N		N	2	2	2	2	2						0		#REF!	0	10
6087672462	153357312	50	Secondary school	المنطقة الشرقية	Urban	9	8	8	N		N	1	1	1	1	0						0		#REF!	0	4
6087670798	153357312	40	Secondary school	المنطقة الشرقية	Urban	6	4	9	N		N	0	1	0	0	1						0		#REF!	0	2
6087670612	153357312	43	Diploma	المنطقة الشرقية	Rural	6	5	4.5	N		N	1	1	0	1	0						0		#REF!	0	3
6087669924	153357312	40	Post graduate	المنطقة الشرقية	Urban	7	5	2	y		y	0	0	0	0	0	1							#REF!	1	1
6087667047	153357312	40	Post graduate	المنطقة الشرقية	Urban	4	3	3	N		N	2	2	2	2	2	1	1					1	#REF!	2	12
6087660424	153357312	45	Bachelor	المنطقة الشرقية	Urban	11	7	1.25	y		y	0	0	0	0	0						0		#REF!	0	0
6087657916	153357312	25	Post graduate	مكة المكرمة	Urban	1	1	0.0833333	y		y	2	0	0	1	1						0		#REF!	0	4
6087657539	153357312	50	Bachelor	المنطقة الشرقية	Urban	4	4	14	N		N	2	2	2	2	2						0		#REF!	0	10
6087655610	153357312	28	Bachelor	المنطقة الشرقية	Urban	1	1	2	N		N	2	2	2	2	2	1			1	1			#REF!	2	12
6087655251	153357312	42	Bachelor	المنطقة الشرقية	Rural	3	3	7	N		N													#REF!	0
6087650624	153357312	44	Secondary school	الرياض	Urban	4	4	15	N		N	2	2	2	2	2						0		#REF!	0	10
6087648083	153357312	21	Bachelor	مكة المكرمة	Urban	1	0	-	N	2	N	2	2	2	2	2						0		#REF!	0	10
6087646818	153357312	28	Bachelor	المنطقة الشرقية	Urban	2	1	3.5	y	7	y	2	2	2	2	2	1				1			#REF!	2	12
6087646264	153357312	32	Bachelor	المنطقة الشرقية	Urban	3	3	0.5	y		y	2	2	2	2	2						0		#REF!	0	10
6087645513	153357312	35	Secondary school	الرياض	Urban	5	4	7	N		N	1	1	0	1	1					1			#REF!	1	5
6087642078	153357312	35	Bachelor	المنطقة الشرقية	Rural	4	2	6	N		N	2	2	2	2	2	1							#REF!	1	11
6087640071	153357312	30	Intermediate school	المنطقة الشرقية	Urban	3	3	1.91667	N		N	0	1	1	1	1				1				#REF!	1	5
6087640039	153357312	50	Secondary school	المنطقة الشرقية	Urban	9	4	21	N		N	1	1	2	2	2	1							#REF!	1	9
6087627825	153357312	30	Post graduate	الرياض	Urban	3	2	3	N	5	N	1	1	0	0	0						0		#REF!	0	2
6087626653	153357312	47	Bachelor	المنطقة الشرقية	Urban	7	5	10	N		N	1	1	1	2	1					1			#REF!	1	7
6087626395	153357312	49	Secondary school	المنطقة الشرقية	Rural	12	4	21	N		N	2	2	2	2	2	1							#REF!	1	11
6087623608	153357312	42	Secondary school	المنطقة الشرقية	Urban	4	4	6	N		N													#REF!	0
6087622197	153357312	42	Bachelor	المنطقة الشرقية	Urban	5	1	6	N		N	2	2	2	2	2	1		1		1		1	#REF!	2	12
6087621124	153357312	41	Secondary school	المنطقة الشرقية	Urban	5	5	1	y		y	0	1	0	0	1						0		#REF!	0	2
6087620640	153357312	24	Bachelor	المنطقة الشرقية	Urban	1	1	0.416667	y		y	0	1	0	0	0						0		#REF!	0	1
6087620226	153357312	22	Bachelor	المنطقة الشرقية	Rural	1		-	N	3	N	2	2	2	2	2	1				1			#REF!	2	12
6087620192	153357312	27	Post graduate	المنطقة الشرقية	Rural	3	2	7	N	9	N	2	2	1	1	2						0		#REF!	0	8
6087619997	153357312	27	Secondary school	المنطقة الشرقية	Urban	1	1	0.333333	y		y	2	1	2	2	2							1	#REF!	1	10
6087619525	153357312	27	Post graduate	مكة المكرمة	Urban	5	4	0.416667	y		y	1	0	0	1	1						0		#REF!	0	3
6087619427	153357312	38	Bachelor	الرياض	Urban	4	4	4.66667	N		N	2	1	0	0	0				1				#REF!	1	4
6087618904	153357312	29	Bachelor	المنطقة الشرقية	Rural	1	2	1.66667	N		N	2	2	1	1	2							1	#REF!	1	9
6087618690	153357312	23	Secondary school	المنطقة الشرقية	Urban	1	1	3	N		N	2	1	1	1	0						0		#REF!	0	5
6087617115	153357312	35	Secondary school	المنطقة الشرقية	Urban	3	3	6.5	N		N													#REF!	0
6087616499	153357312	35	Bachelor	المنطقة الشرقية	Rural	1	4	2.25	N		N	0	1	0	0	1						0		#REF!	0	2
6087615389	153357312	49	Bachelor	مكة المكرمة	Urban	3	3	12	N		N	2	1	2	2	2						0		#REF!	0	9
6087614984	153357312	33	Post graduate	المنطقة الشرقية	Urban	4	3	3	N		N													#REF!	0
6087614177	153357312	36	Post graduate	المنطقة الشرقية	Urban	1	1	6	N		N	2	2	2	2	2	1							#REF!	1	11
6087613185	153357312	37	Post graduate	المنطقة الشرقية	Rural	4	4	0.583333	y		y	0	0	1	0	0						0		#REF!	0	1
6087611742	153357312	32	Bachelor	المنطقة الشرقية	Urban	1	1	0.333333	N	2	N	2	2	2	2	2	1							#REF!	1	11
6087610144	153357312	30	Bachelor	المنطقة الشرقية	Urban	1	1	0.416667	y		y	2	2	2	2	2	1			1	1			#REF!	2	12
6087609817	153357312	26	Post graduate	المنطقة الشرقية	Urban	0	0	-	N		N													#REF!	0
6087608537	153357312	30	Bachelor	المنطقة الشرقية	Urban	1	1	0.5	y	2	y	2	2	2	2	2				1				#REF!	1	11
6087608172	153357312	34	Post graduate	الرياض	Urban	5	3	0.25	N		N	1	0	0	0	0						0		#REF!	0	1
6087606785	153357312	33	Bachelor	المنطقة الشرقية	Urban	3	2	4	N		N	1	1	0	0	1	1							#REF!	1	4
6087606691	153357312	30	Bachelor	المنطقة الشرقية	Urban	4	3	0.25	y		y	1	1	0	1	2	1							#REF!	1	6
6087606168	153357312	31	Bachelor	المدينة المنورة	Urban	1	1	0.333333	y		y	2	1	2	2	2				1				#REF!	1	10
6087604720	153357312	40	Bachelor	المنطقة الشرقية	Rural	1	1	4	N	2	N	2	2	2	2	2	1			1				#REF!	2	12
6087604520	153357312	35	Diploma	المنطقة الشرقية	Rural	6	2	8	N	6	N	2	2	2	2	2	1						1	#REF!	2	12
6087603079	153357312	34	Secondary school	المنطقة الشرقية	Urban	3	3	7	N		N	1	0	0	0	0						0		#REF!	0	1
6087603053	153357312	29	Diploma	المنطقة الشرقية	Urban	2	2	3	N		N	2	1	1	1	1						0		#REF!	0	6
6087602811	153357312	26	Bachelor	المنطقة الشرقية	Urban	1	1	3	N		N	2	1	0	2	0						0		#REF!	0	5
6087601950	153357312	30	Post graduate	الرياض	Urban	7	2	0.166667	y		y	2	2	2	2	2	1		1					#REF!	2	12
6087601119	153357312	38	Diploma	المنطقة الشرقية	Urban	3	3	1.5	N		N	2	0	0	1	0						0		#REF!	0	3
6087600475	153357312	29	Post graduate	المنطقة الشرقية	Urban	0	0	-	N		N													#REF!	0
6087599793	153357312	27	Secondary school	المنطقة الشرقية	Urban	3	0	-	N	8	N	2	2	2	2	2	1			1	1			#REF!	2	12
6087598046	153357312	38	Bachelor	المنطقة الشرقية	Urban	4	4	4	N		N	1	0	0	0	1						0		#REF!	0	2
6087594692	153357312	33	Post graduate	المنطقة الشرقية	Urban	1	1	5	N		N	1	2	1	1	2						0		#REF!	0	7
6087593564	153357312	44	Bachelor	المنطقة الشرقية	Urban	6	4	14	N		N	0	1	0	0	1						0		#REF!	0	2
6087591542	153357312	32	Bachelor	المنطقة الشرقية	Urban	1	0	-	N		N													#REF!	0
6087590368	153357312	28	Bachelor	المنطقة الشرقية	Urban	1	2	2	N		N	2	2	2	2	2	1	1			1			#REF!	2	12
6087586970	153357312	33	Secondary school	المنطقة الشرقية	Urban	3	2	8	N		N	0	0	0	0	0						0		#REF!	0	0
6087581927	153357312	37	Diploma	المنطقة الشرقية	Urban	3	3	3.5	N		N	0	0	0	0	0						0		#REF!	0	0
6087576865	153357312	24	Bachelor	المنطقة الشرقية	Rural	1	1	0.166667	y		y	2	2	2	2	2	1				1			#REF!	2	12
6087575449	153357312	37	Secondary school	المنطقة الشرقية	Urban	2	2	5	N		N	2	2	2	2	2				1				#REF!	1	11
6087574783	153357312	32	Post graduate	المنطقة الشرقية	Urban	1	1	2	N		N	1	2	2	2	2	1							#REF!	1	10
6087574767	153357312	25	Bachelor	المنطقة الشرقية	Rural	2	2	3	N		N	2	2	2	2	2					1			#REF!	1	11
6087574689	153357312	32	Bachelor	المنطقة الشرقية	Urban	3	3	2.5	N		N	2	2	2	2	2						0		#REF!	0	10
6087573038	153357312	28	Secondary school	المنطقة الشرقية	Rural	4	4	2.33333	N		N	2	0	0	0	0						0		#REF!	0	2
6087571812	153357312	40	Bachelor	المنطقة الشرقية	Urban	1	1	3	N		N	2	2	2	2	2						0		#REF!	0	10
6087567225	153357312	25	Bachelor	المنطقة الشرقية	Urban	3	2	5	N	2	N	2	2	2	1	2						0		#REF!	0	9
6087563405	153357312	26	Secondary school	المنطقة الشرقية	Urban	2	2	3.5	N		N	2	1	0	0	1						0		#REF!	0	4
6087562864	153357312	32	Bachelor	المنطقة الشرقية	Urban	3	3	2	N		N													#REF!	0
6087561549	153357312	34	Bachelor	المنطقة الشرقية	Urban	2	2	2	N		N	2	2	2	2	2						0		#REF!	0	10
6087561386	153357312	26	Diploma	الرياض	Urban	3	3	4	N		N	1	0	0	0	0						0		#REF!	0	1
6087558216	153357312	30	Diploma	المنطقة الشرقية	Urban	3	3	0.75	y		y	1	1	0	0	1				1				#REF!	1	4
6087556805	153357312	25	Secondary school	المنطقة الشرقية	Urban	3	2	0.123626	y		y	2	2	2	2	2	1			1	1			#REF!	2	12
6087554993	153357312	31	Diploma	المنطقة الشرقية	Urban	2	2	1.16667	y		y	2	2	1	1	1						0		#REF!	0	7
6087543102	153357312	34	Post graduate	المنطقة الشرقية	Urban	6	4	0.25	y		y	1	1	1	1	1						0		#REF!	0	5
6087538050	153357312	23	Secondary school	المنطقة الشرقية	Rural	1	1	0.583333	y		y	2	2	2	2	2				1				#REF!	1	11
6087537544	153357312	36	Post graduate	المنطقة الشرقية	Urban	2	2	10	N		N	2	2	2	2	2	1							#REF!	1	11
6087533171	153357312	35	Bachelor	المنطقة الشرقية	Urban	6	4	3	N	6	N													#REF!	0
6087532283	153357312	50	Bachelor	المنطقة الشرقية	Urban	5	5	10	N		N	2	2	2	2	2					1			#REF!	1	11
6087531617	153357312	31	Bachelor	المنطقة الشرقية	Urban	3	3	0.5	y		y	2	1	2	2	2				1				#REF!	1	10
6087530779	153357312	46	Secondary school	الباحة	Rural	6	5	4	N		N	1	1	0	1	0						0		#REF!	0	3
6087530507	153357312	32	Bachelor	المنطقة الشرقية	Urban	3	2	3.33333	N		N	1	2	0	1	0						0		#REF!	0	4
6087528885	153357312	20	Secondary school	المنطقة الشرقية	Urban	0	0	-	N		N													#REF!	0
6087526422	153357312	33	Secondary school	المنطقة الشرقية	Rural	3	3	5	N		N													#REF!	0
6087522788	153357312	26	Post graduate	الرياض	Urban	1	1	1.16667	N		N	2	2	2	2	2	1				1			#REF!	2	12
6087520376	153357312	28	Bachelor	المنطقة الشرقية	Rural	2	2	3	N		N	1	0	0	1	1						0		#REF!	0	3
6087519331	153357312	23	Secondary school	المنطقة الشرقية	Rural	2	2	1	y		y	0	0	1	0	1	1							#REF!	1	3
6087517091	153357312	38	Secondary school	المنطقة الشرقية	Urban	5	5	3	N		N	0	2	0	0	1					1			#REF!	1	4
6087515491	153357312	38	Bachelor	المنطقة الشرقية	Rural	5	5	0.166667	y		y	1	0	0	0	1						0		#REF!	0	2
6087515367	153357312	32	Bachelor	المنطقة الشرقية	Urban	3	3	1.16667	y		y	2	0	0	0	1				1				#REF!	1	4
6087512123	153357312	32	Post graduate	المنطقة الشرقية	Urban	4	2	2	N	7	N	2	1	0	1	1						0		#REF!	0	5
6087511863	153357312	40	Secondary school	المنطقة الشرقية	Urban	5	4	9	y		y	2	2	2	1	2						0		#REF!	0	9
6087511162	153357312	41	Bachelor	المنطقة الشرقية	Urban	6	3	1	y		y	2	2	2	2	2						0		#REF!	0	10
6087510925	153357312	40	Bachelor	المنطقة الشرقية	Rural	5	4	7	N		N	2	0	0	0	1						0		#REF!	0	3
6087509446	153357312	34	Post graduate	المنطقة الشرقية	Urban	2	2	2	N		N	2	2	2	2	2	1							#REF!	1	11
6087508920	153357312	43	Intermediate school	المنطقة الشرقية	Rural	10	9	3	N		N													#REF!	0
6087508505	153357312	31	Bachelor	المنطقة الشرقية	Urban	1	1	5	N		N	2	2	2	2	2	1							#REF!	1	11
6087508173	153357312	26	Bachelor	المنطقة الشرقية	Urban	2	2	0.416667	N	5	N	2	2	2	2	2	1							#REF!	1	11
6087507149	153357312	25	Bachelor	مكة المكرمة	Urban	2	0	0	N	4	N													#REF!	0
6087506600	153357312	30	Bachelor	المنطقة الشرقية	Urban	2	1	0.75	N		N	2	2	2	2	2	1							#REF!	1	11
6087505928	153357312	26	Bachelor	المنطقة الشرقية	Urban	2	2	5	N		N													#REF!	0
6087505024	153357312	29	Bachelor	المنطقة الشرقية	Urban	1	1	0.333333	y		y	2	2	2	2	2						0		#REF!	0	10
6087502471	153357312	34	Diploma	المنطقة الشرقية	Urban	3	1	0.833333	N	5	N	1	0	0	0	1						0		#REF!	0	2
6087501946	153357312	45	Bachelor	المنطقة الشرقية	Urban	5	5	11	N		N	1	0	0	0	0						0		#REF!	0	1
6087500698	153357312	34	Diploma	المنطقة الشرقية	Urban	3	2	0.833333	N	5	N	1	0	0	0	1						0		#REF!	0	2
6087500635	153357312	33	Bachelor	الرياض	Urban	2	2	2.33333	N		N	2	0	0	0	1						0		#REF!	0	3
6087499272	153357312	31	Bachelor	المنطقة الشرقية	Rural	3	3	0.166667	y		y	0	2	1	2	2						0		#REF!	0	7
6087498702	153357312	32	Bachelor	المنطقة الشرقية	Urban	2	2	6	N		N	1	1	1	1	2			1					#REF!	1	7
6087498173	153357312	36	Bachelor	المنطقة الشرقية	Rural	4	3	0.416667	y		y	2	0	0	0	1						0		#REF!	0	3
6087497889	153357312	32	Bachelor	المنطقة الشرقية	Urban	6	4	0.833333	y		y	2	1	2	2	0						0		#REF!	0	7
6087497437	153357312	31	Bachelor	المنطقة الشرقية	Urban	1	1	0.833333	N		N	1	1	0	0	1						0		#REF!	0	3
6087496626	153357312	40	Bachelor	المنطقة الشرقية	Urban	4	3	6	N		N	2	2	2	2	2				1	1			#REF!	2	12
6087496009	153357312	24	Bachelor	المنطقة الشرقية	Rural	2	2	0.0833333	y		y	2	2	2	2	2				1			1	#REF!	2	12
6087495982	153357312	22	Secondary school	المنطقة الشرقية	Rural	1	1	2	N		N													#REF!	0
6087495762	153357312	23	Secondary school	المنطقة الشرقية	Urban	1	1	3	N		N	2	2	2	2	2						0		#REF!	0	10
6087495571	153357312	24	Bachelor	المنطقة الشرقية	Urban	2	2	2	N		N	1	0	0	0	0						0		#REF!	0	1
6087495077	153357312	33	Post graduate	المنطقة الشرقية	Urban	2	2	1	y		y	2	2	2	2	2				1				#REF!	1	11
6087494770	153357312	40	Bachelor	المنطقة الشرقية	Urban	3	3	6	N		N	2	2	2	2	2						0		#REF!	0	10
6087494273	153357312	33	Bachelor	الرياض	Urban	6	4	1	N		N	1	1	0	1	0						0		#REF!	0	3
6087493696	153357312	32	Post graduate	المنطقة الشرقية	Urban	3	1	2.5	N	2	N	1	0	1	1	1						0		#REF!	0	4
6087493407	153357312	22	Bachelor	المنطقة الشرقية	Rural	2	2	0.833333	y		y	2	0	0	0	0						0		#REF!	0	2
6087493087	153357312	32	Bachelor	المنطقة الشرقية	Rural	4	3	1	y		y	2	2	2	2	2	1				1			#REF!	2	12
6087492623	153357312	30	Bachelor	المنطقة الشرقية	Urban	1	1	1.25	N		N	2	2	2	2	2				1			1	#REF!	2	12
6087491828	153357312	25	Secondary school	المنطقة الشرقية	Urban	4	4	0.416667	y		y	2	2	2	2	2	1							#REF!	1	11
6087491546	153357312	21	Bachelor	المنطقة الشرقية	Urban	1	0	0.5	y		y	2	2	2	2	2	1			1	1			#REF!	2	12
6087490935	153357312	30	Bachelor	المنطقة الشرقية	Urban	1	1	2	N		N	2	2	1	1	2						0		#REF!	0	8
6087489384	153357312	36	Secondary school	المنطقة الشرقية	Rural	3	3	8	N		N	0	0	1	0	0						0		#REF!	0	1
6087489185	153357312	32	Bachelor	المنطقة الشرقية	Urban	1	1	0.5	y		y	2	2	2	2	2	1			1			1	#REF!	2	12
6087489005	153357312	35	Bachelor	المنطقة الشرقية	Urban	2	2	10	N		N	2	2	2	2	2				1	1			#REF!	2	12
6087488926	153357312	37	Bachelor	المنطقة الشرقية	Rural	5	3	0.833333	y		y	2	2	1	2	2							1	#REF!	1	10
6087487546	153357312	37	Secondary school	المنطقة الشرقية	Rural	5	4	4	N		N	2	1	2	2	2						0		#REF!	0	9
6087486064	153357312	31	Post graduate	المنطقة الشرقية	Urban	3	3	1	y		y	1	0	0	0	0						0		#REF!	0	1
6087485413	153357312	27	Secondary school	المنطقة الشرقية	Urban	2	2	1.5	y		y	2	0	0	0	0						0		#REF!	0	2
6087485115	153357312	29	Bachelor	عسير	Urban	1	1	1.41667	y		y	1	1	0	2	0						0		#REF!	0	4
6087483931	153357312	25	Bachelor	المنطقة الشرقية	Urban	2	2	1.5	y		y	1	0	0	1	0						0		#REF!	0	2
6087483489	153357312	25	Bachelor	المنطقة الشرقية	Urban	1	0	-	N	5	N	1	1	0	0	1	1			1	1			#REF!	2	5
6087482966	153357312	43	Secondary school	المنطقة الشرقية	Urban	4	4	7	N		N	0	1	0	0	0						0		#REF!	0	1
6087482892	153357312	35	Diploma	الرياض	Urban	4	2	9	N		N	2	2	2	2	2	1			1	1			#REF!	2	12
6087482317	153357312	36	Bachelor	المنطقة الشرقية	Urban	4	3	5	N		N	1	1	0	0	1						0		#REF!	0	3
6087481828	153357312	45	Secondary school	المنطقة الشرقية	Rural	6	5	9	N		N	1	1	1	1	2						0		#REF!	0	6
6087481378	153357312	29	Secondary school	المنطقة الشرقية	Urban	2	2	4	N		N	1	1	0	1	1						0		#REF!	0	4
6087477568	153357312	42	Secondary school	المنطقة الشرقية	Urban	3	3	8	N		N	2	2	2	2	2						0		#REF!	0	10
6087474712	153357312	42	Diploma		Urban	2	2	7	N		N	0	0	0	0	0						0		#REF!	0	0
6087474048	153357312	33	Post graduate	المنطقة الشرقية	Urban	3	2	5	N	8	N	1	0	0	0	0	1							#REF!	1	2
6087472599	153357312	21	Secondary school	المنطقة الشرقية	Urban	1	1	6	N		N	2	2	2	2	2	1			1				#REF!	2	12
6087472469	153357312	27	Bachelor	المنطقة الشرقية	Rural	2	2	2	N		N													#REF!	0
6087472066	153357312	32	Post graduate	الرياض	Urban	2	1	5	N		N	2	2	2	2	2	1			1	1			#REF!	2	12
6087471972	153357312	30	Bachelor	المنطقة الشرقية	Urban	2	2	4	N		N	2	2	2	2	2						0		#REF!	0	10
6087471322	153357312	26	Bachelor	المنطقة الشرقية	Urban	1	0	-	N	2	N													#REF!	0
6087471261	153357312	36	Secondary school	المنطقة الشرقية	Urban	4	4	2	N		N	2	1	0	1	2						0		#REF!	0	6
6087470613	153357312	39	Post graduate	المنطقة الشرقية	Urban	5	4	6	N		N	2	2	2	2	2						0		#REF!	0	10
6087470054	153357312	20	Bachelor	المنطقة الشرقية	Rural	1	1	1	y		y													#REF!	0
6087469888	153357312	27	Bachelor	المنطقة الشرقية	Urban	1	1	4	N		N	2	2	2	2	2						0		#REF!	0	10
6087468942	153357312	34	Bachelor	المنطقة الشرقية	Urban	3	3	1.91667	y		y	1	1	1	1	1						0		#REF!	0	5
6087467985	153357312	31	Bachelor	المدينة المنورة	Urban	1	1	3	N		N	1	2	0	2	1						0		#REF!	0	6
6087467114	153357312	24	Secondary school	المنطقة الشرقية	Urban	2	2	3	N		N	1	0	0	0	0						0		#REF!	0	1
6087466782	153357312	28	Bachelor	المنطقة الشرقية	Urban	2	2	0.75	y		y	2	2	2	2	2	1							#REF!	1	11
6087466771	153357312	26	Bachelor	المنطقة الشرقية	Urban	2	2	0.416667	N		N	1	1	0	0	0	1							#REF!	1	3
6087466725	153357312	46	Secondary school	المنطقة الشرقية	Rural	11	5	5	N		N	2	2	2	2	0						0		#REF!	0	8
6087466628	153357312	28	Bachelor	المنطقة الشرقية	Urban	2	2	4	N		N	1	1	2	2	2				1				#REF!	1	9
6087466482	153357312	36	Secondary school	المنطقة الشرقية	Urban	2	2	2	N		N													#REF!	0
6087466119	153357312	25	Secondary school	الرياض	Urban	2	2	1.16667	y		y	0	2	2	2	2	1			1	1			#REF!	2	10
6087465823	153357312	40	Bachelor	المنطقة الشرقية	Urban	2	2	9	N	2	N	2	1	2	1	2					1			#REF!	1	9
6087465762	153357312	23	Bachelor	المنطقة الشرقية	Urban	5	5	3	N	5	N	2	2	2	1	2	1		1	1	1			#REF!	2	11
6087465506	153357312	40	Bachelor	المنطقة الشرقية	Rural	3	2	9	N		N	2	2	2	2	2				1				#REF!	1	11
6087464975	153357312	44	Secondary school	المنطقة الشرقية	Rural	7	6	9	N		N	2	0	0	0	0						0		#REF!	0	2
6087464919	153357312	25	Diploma	المنطقة الشرقية	Urban	1	1	2	N		N	2	2	2	2	2	1							#REF!	1	11
6087464308	153357312	40	Bachelor	المنطقة الشرقية	Rural	8	3	6	N	8	N	1	1	1	1	1						0		#REF!	0	5
6087464193	153357312	30	Post graduate	المدينة المنورة	Urban	1	1	0.333333	N		N	2	2	2	2	2						0		#REF!	0	10
6087464028	153357312	28	Diploma	المنطقة الشرقية	Urban	4	4	0.25	y		y	1	1	0	0	0						0		#REF!	0	2
6087463962	153357312	44	Bachelor	المنطقة الشرقية	Urban	6	6	3	N		N	0	1	0	0	1						0		#REF!	0	2
6087463379	153357312	32	Diploma	المنطقة الشرقية	Urban	2	2	2.5	N		N	2	2	2	2	2							1	#REF!	1	11
6087462829	153357312	35	Post graduate	المنطقة الشرقية	Rural	2	1	5	N	7	N	2	2	2	2	2	1			1				#REF!	2	12
6087462395	153357312	36	Bachelor	المنطقة الشرقية	Urban	2	3	2	N		N	2	2	2	2	2	1			1	1		1	#REF!	2	12
6087461984	153357312	49	Secondary school	المنطقة الشرقية	Rural	6	4	9	N		N	2	2	2	2	2	1		1	1	1			#REF!	2	12
6087461967	153357312	29	Bachelor	المنطقة الشرقية	Rural	3	2	1.5	N		N	1	1	1	1	1						0		#REF!	0	5
6087461827	153357312	35	Bachelor	المنطقة الشرقية	Urban	4	3	3	N		N	2	2	2	2	2						0		#REF!	0	10
6087461719	153357312	43	Bachelor	المنطقة الشرقية	Rural	5	4	17	N		N	2	2	2	2	2						0		#REF!	0	10
6087461309	153357312	35	Diploma	المنطقة الشرقية	Rural	4	3	5	N		N	2	1	2	2	2	1			1	1			#REF!	2	11
6087461010	153357312	38	Diploma	المنطقة الشرقية	Urban	3	3	13	N		N	0	0	0	2	2	1							#REF!	1	5
6087460992	153357312	32	Bachelor	المنطقة الشرقية	Urban	3		1	y		y	2	2	2	2	2	1				1			#REF!	2	12
6087460788	153357312	33	Bachelor	المنطقة الشرقية	Urban	4	4	2	N		N	1	1	1	1	0						0		#REF!	0	4
6087460219	153357312	29	Bachelor	المنطقة الشرقية	Rural	2	2	4.5	N		N	1	1	0	0	1						0		#REF!	0	3
6087459205	153357312	40	Diploma	المنطقة الشرقية	Urban	1	0	1	N		N	1	1	1	1	1						0		#REF!	0	5
6087458990	153357312	31	Diploma	المنطقة الشرقية	Urban	1	1	1.41667	y		y	2	2	2	2	2				1				#REF!	1	11
6087458754	153357312	42	Bachelor	المنطقة الشرقية	Urban	3	2	15	N		N	2	2	2	2	2						0		#REF!	0	10
6087456760	153357312	29	Bachelor	الرياض	Urban	1	1	0.75	N		N	2	2	2	2	2						0		#REF!	0	10
6087454481	153357312	34	Secondary school	المنطقة الشرقية	Urban	5	4	11	N		N	2	1	0	1	1						0		#REF!	0	5
6087454179	153357312	36	Secondary school	المنطقة الشرقية	Urban	1	1	1	y		y	2	2	2	2	2	1							#REF!	1	11
6087453774	153357312	30	Bachelor	المنطقة الشرقية	Urban	2	1	1	N	4	N	2	2	2	2	2					1			#REF!	1	11
6087453558	153357312	27	Bachelor	المنطقة الشرقية	Rural	1	1	4	N		N	2	2	2	2	2					1			#REF!	1	11
6087452775	153357312	28	Bachelor	المنطقة الشرقية	Urban	4	4	1.5	N		N													#REF!	0
6087452524	153357312	30	Bachelor	عسير	Urban	2	2	5	N		N	2	2	2	2	2						0		#REF!	0	10
6087451911	153357312	45	Secondary school	المنطقة الشرقية	Urban	6	6	7	N		N													#REF!	0
6087451616	153357312	29	Diploma	المنطقة الشرقية	Rural	2	2	1.5	N		N	2	2	1	0	1						0		#REF!	0	6
6087451070	153357312	36	Secondary school	المنطقة الشرقية	Urban	4	3	2	N		N													#REF!	0
6087450862	153357312	31	Bachelor	المنطقة الشرقية	Urban	2	1	4	N	9	N	2	2	1	1	1				1	1			#REF!	2	9
6087450553	153357312	28	Diploma	المنطقة الشرقية	Rural	1	1	4	N		N	2	1	1	2	0	1							#REF!	1	7
6087450079	153357312	42	Diploma	المنطقة الشرقية	Urban	3	3	12	N		N	2	2	2	2	2						0		#REF!	0	10
6087449613	153357312	42	Bachelor	المنطقة الشرقية	Urban	5	4	7	N		N	2	2	2	2	2						0		#REF!	0	10
6087449177	153357312	27	Bachelor	المنطقة الشرقية	Urban	1	1	4	N		N	2	1	1	1	0						0		#REF!	0	5
6087448990	153357312	50	Bachelor	المنطقة الشرقية	Urban	4	4	18	N		N	2	2	2	2	2						0		#REF!	0	10
6087448802	153357312	22	Secondary school	المنطقة الشرقية	Rural	1	1	0.916667	N		N	2	1	2	2	2	1			1	1			#REF!	2	11
6087448794	153357312	28	Bachelor	المنطقة الشرقية	Rural	3	3	0.833333	y		y	1	1	0	1	1						0		#REF!	0	4
6087448525	153357312	33	Bachelor	المنطقة الشرقية	Urban	3	3	1.83333	N		N	2	2	2	2	2				1	1			#REF!	2	12
6087448105	153357312	38	Diploma	مكة المكرمة	Urban	1	1	20	N		N	2	0	0	2	0						0		#REF!	0	4
6087447830	153357312	34	Post graduate	المنطقة الشرقية	Urban	3	3	3	N		N	1	0	0	0	1	1	1	1	1	1			#REF!	2	4
6087446479	153357312	33	Bachelor	المنطقة الشرقية	Urban	3	3	0.5	y		y	2	0	1	0	1						0		#REF!	0	4
6087446471	153357312	23	Bachelor	المنطقة الشرقية	Urban	1	1	0.166667	y		y	2	2	2	2	0						0		#REF!	0	8
6087445856	153357312	34	Post graduate	المنطقة الشرقية	Urban	4	3	5	N		N	1	2	1	2	0						0		#REF!	0	6
6087445720	153357312	46	Bachelor	المنطقة الشرقية	Urban	5	3	11	N		N	1	1	2	2	2						0		#REF!	0	8
6087445161	153357312	31	Post graduate	مكة المكرمة	Urban	3	3	0.416667	y		y	0	1	0	1	0							1	#REF!	1	3
6087444957	153357312	39	Secondary school	المنطقة الشرقية	Rural	6	5	0.583333	y		y	2	1	0	2	2	1							#REF!	1	8
6087444345	153357312	31	Bachelor	المنطقة الشرقية	Urban	1	1	3	N		N	2	1	0	0	1	1							#REF!	1	5
6087444270	153357312	30	Bachelor	المنطقة الشرقية	Urban	5	4	2	N		N	0	0	0	0	0						0		#REF!	0	0
6087443900	153357312	21	Secondary school	المنطقة الشرقية	Urban	2	1	0.5	y		y	2	2	2	2	2	1							#REF!	1	11
6087443790	153357312	30	Bachelor	المنطقة الشرقية	Rural	4	4	1.5	y		y	0	0	0	0	0						0		#REF!	0	0
6087443746	153357312	42	Diploma	المنطقة الشرقية	Urban	6	4	5	N		N	2	0	0	1	1	1							#REF!	1	5
6087442852	153357312	27	Bachelor	المنطقة الشرقية	Urban	2	2	1	N		N	2	0	0	2	1	1				1			#REF!	2	7
6087442545	153357312	40	Bachelor	المنطقة الشرقية	Urban	4	5	10	N		N													#REF!	0
6087442542	153357312	29	Secondary school	المنطقة الشرقية	Urban	2	2	4	N		N	2	0	0	0	1						0		#REF!	0	3
6087442140	153357312	30	Secondary school	المنطقة الشرقية	Rural	2	2	3	N		N	2	2	2	2	2						0		#REF!	0	10
6087442132	153357312	32	Bachelor	المنطقة الشرقية	Urban	5	3	0.833333	y		y	1	1	0	0	0				1				#REF!	1	3
6087442020	153357312	27	Secondary school	المنطقة الشرقية	Urban	1	1	1	y		y													#REF!	0
6087441632	153357312	41	Bachelor	المنطقة الشرقية	Urban	5	5	1.66667	y		y	1	1	0	0	0						0		#REF!	0	2
6087440821	153357312	42	Bachelor	المنطقة الشرقية	Urban	2	3	6	N		N													#REF!	0
6087440570	153357312	45	Diploma	المنطقة الشرقية	Urban	5	4	6	N		N	2	2	2	2	2	1							#REF!	1	11
6087438686	153357312	39	Intermediate school	المنطقة الشرقية	Rural	6	5	2	N		N													#REF!	0
6087438568	153357312	37	Secondary school	المنطقة الشرقية	Rural	4	3	4.08333	N		N	2	2	2	2	2	1				1			#REF!	2	12
6087438062	153357312	27	Bachelor	مكة المكرمة	Urban	2	2	0.416667	N		N	2	0	0	0	0						0		#REF!	0	2
6087437808	153357312	32	Bachelor	المنطقة الشرقية	Urban	2	2	1	y		y	2	2	2	2	2	1							#REF!	1	11
6087437229	153357312	32	Diploma	المنطقة الشرقية	Urban	2	2	0.333333	N		N	2	2	2	2	2							1	#REF!	1	11
6087436884	153357312	25	Post graduate	مكة المكرمة	Urban	1	1	4	N		N	2	2	2	2	2						0		#REF!	0	10
6087435665	153357312	32	Secondary school	المنطقة الشرقية	Urban	1	1	2	N		N	2	2	2	2	2	1							#REF!	1	11
6087435207	153357312	33	Post graduate	المنطقة الشرقية	Rural	1	1	4	N		N	1	0	0	2	1						0		#REF!	0	4
6087434807	153357312	31	Bachelor	المنطقة الشرقية	Urban	1		4	N		N	2	2	2	2	2	1			1	1			#REF!	2	12
6087434336	153357312	47	Bachelor	المنطقة الشرقية	Rural	5	4	9	N		N	2	1	1	2	2	1			1	1			#REF!	2	10
6087434166	153357312	31	Bachelor	المنطقة الشرقية	Urban	2	1	2.41667	N		N	2	2	2	2	2	1							#REF!	1	11
6087433075	153357312	26	Bachelor	المنطقة الشرقية	Urban	4	1	9	N		N	2	2	0	0	1						0		#REF!	0	5
6087432479	153357312	39	Post graduate	المنطقة الشرقية	Urban	4	4	3	N		N	2	2	2	2	2						0		#REF!	0	10
6087431560	153357312	30	Bachelor	الرياض	Urban	3	1	5	N		N	2	2	2	2	2	1				1			#REF!	2	12
6087431527	153357312	39	Bachelor	الرياض	Urban	2	2	2	N		N	2	0	0	0	1						0		#REF!	0	3
6087430997	153357312	26	Diploma	المدينة المنورة	Urban	0	0	-	N		N	2	2	1	1	2	1				1			#REF!	2	10
6087430775	153357312	41	Bachelor	الرياض	Urban	10	4	1.66667	N		N	2	0	0	0	0						0		#REF!	0	2
6087430680	153357312	42	Secondary school	المنطقة الشرقية	Rural	5	4	1.5	N		N	2	2	1	2	1						0		#REF!	0	8
6087430618	153357312	25	Bachelor	المنطقة الشرقية	Urban	2	1	0.666667	N		N	2	2	2	2	2	1							#REF!	1	11
6087429294	153357312	33	Bachelor	المنطقة الشرقية	Urban	2	2	2	N		N	2	2	2	2	2	1							#REF!	1	11
6087427948	153357312	31	Bachelor	الرياض	Urban	2	0	-	N		N	1	0	0	2	2						0		#REF!	0	5
6087427703	153357312	29	Bachelor		Rural	1	1	1.25	y		y	2	2	2	2	2	1			1	1			#REF!	2	12
6087427044	153357312	44	Bachelor	المنطقة الشرقية	Urban	4	4	1.58333	y			2	0	1	1	1	1			1				#REF!	2	7
6087427001	153357312	34	Diploma	المنطقة الشرقية	Urban	2	2	1.41667	N		N	2	2	2	2	2	1							#REF!	1	11
6087426720	153357312	31	Diploma	المنطقة الشرقية	Rural	4	2	2	N		N	2	2	1	1	1	1		1					#REF!	2	9
6087426125	153357312	20	Bachelor	المنطقة الشرقية	Urban	1	0	-	N	4	N	2	2	1	1	2	1		1	1	1			#REF!	2	10
6087425279	153357312	35	Bachelor	المنطقة الشرقية	Urban	5	3	4	N		N	0	0	0	0	0						0		#REF!	0	0
6087424727	153357312	26	Bachelor	المنطقة الشرقية	Urban	1	1	3	N		N	2	1	0	1	1						0		#REF!	0	5
6087424543	153357312	26	Bachelor	المنطقة الشرقية	Rural	3	0	-	N	4	N	2	2	2	2	2			1	1	1		1	#REF!	0	10
6087424127	153357312	23	Diploma	المنطقة الشرقية	Urban	3	1	1	N	4	N	2	1	0	1	1						0		#REF!	0	5
6087423607	153357312	33	Post graduate	المنطقة الشرقية	Urban	2	2	3	N		N	2	2	2	1	2	1			1				#REF!	2	11
6087423508	153357312	34	Post graduate	المنطقة الشرقية	Urban	3	2	8	N	6	N	2	2	2	2	2	1							#REF!	1	11
6087423054	153357312	38	Bachelor	المنطقة الشرقية	Urban	5	4	4	N		N	2	0	0	0	0						0		#REF!	0	2
6087422566	153357312	27	Bachelor	المنطقة الشرقية	Urban	1	1	3	N		N	2	2	2	2	2				1	1			#REF!	2	12
6087422561	153357312	28	Diploma	المنطقة الشرقية	Rural	1	1	1.66667	N		N	2	2	2	2	2						0		#REF!	0	10
6087422458	153357312	24	Bachelor	المنطقة الشرقية	Urban	2	1	3	N		N	2	2	1	1	2	1							#REF!	1	9
6087422204	153357312	45	Post graduate	المنطقة الشرقية	Urban	4	4	10	N		N	2	2	2	2	2	1							#REF!	1	11
6087421027	153357312	28	Bachelor	المنطقة الشرقية	Urban	3	2	0.25	y		y	2	2	2	2	2	1			1	1			#REF!	2	12
6087420990	153357312	30	Bachelor	المنطقة الشرقية	Urban	2	2	0.583333	y		y	2	2	2	2	2	1							#REF!	1	11
6087420643	153357312	40	Post graduate	المنطقة الشرقية	Urban	6	5	5	N		N	1	2	1	1	0						0		#REF!	0	5
6087420567	153357312	33	Bachelor	المنطقة الشرقية	Urban	6	3	3	N		N	1	1	0	0	1						0		#REF!	0	3
6087420203	153357312	28	Bachelor	المنطقة الشرقية	Rural	2	2	3	N		N	1	0	0	0	1						0		#REF!	0	2
6087420018	153357312	29	Bachelor	المنطقة الشرقية	Urban	1	1	1.5	y		y	2	0	0	1	0						0		#REF!	0	3
6087419676	153357312	36	Secondary school	المنطقة الشرقية	Urban	4	3	5	N		N													#REF!	0
6087419265	153357312	29	Bachelor	المنطقة الشرقية	Urban	2	1	2	N		N	2	1	1	1	1						0		#REF!	0	6
6087419104	153357312	45	Post graduate	مكة المكرمة	Urban	6	5	9	N		N	0	2	2	1	2	1				1			#REF!	2	9
6087419011	153357312	41	Bachelor	المنطقة الشرقية	Urban	5	4	22	N		N	2	2	2	2	2	1							#REF!	1	11
6087418206	153357312	40	Bachelor	مكة المكرمة	Urban	3	3	7	N		N	2	1	0	2	1						0		#REF!	0	6
6087417953	153357312	33	Bachelor	المنطقة الشرقية	Rural	6	3	1	y		y	2	2	2	2	2	1							#REF!	1	11
6087417944	153357312	33	Bachelor	المنطقة الشرقية	Rural	2	1	3.33333	N		N	2	2	2	2	2	1	1	1	1	1			#REF!	2	12
6087417479	153357312	25	Secondary school	المنطقة الشرقية	Urban	2	2	0.833333	y		y	2	1	0	1	0						0		#REF!	0	4
6087417127	153357312	46	Post graduate	المنطقة الشرقية	Urban	6	5	3	N		N	0	2	1	2	0	1			1				#REF!	2	7
6087417111	153357312	23	Bachelor	المنطقة الشرقية	Urban	1	1	2	N		N	1	1	1	1	1						0		#REF!	0	5
6087416275	153357312	47	Bachelor	المنطقة الشرقية	Urban	1	0	-	N		N	2	2	2	2	2	1							#REF!	1	11
6087415915	153357312	33	Bachelor	المنطقة الشرقية	Urban	2	1	6	N		N	2	2	2	2	2	1		1					#REF!	2	12
6087415262	153357312	25	Bachelor	المنطقة الشرقية	Rural	2	2	3	N		N	1	1	0	0	1						0		#REF!	0	3
6087414838	153357312	30	Diploma	المنطقة الشرقية	Urban	5	4	2	N		N	1	1	0	1	1						0		#REF!	0	4
6087414558	153357312	30	Bachelor	المنطقة الشرقية	Urban	2	2	0.833333	N		N													#REF!	0
6087414416	153357312	32	Post graduate	المنطقة الشرقية	Urban	2	2	6	N		N	2	2	2	2	2						0		#REF!	0	10
6087414334	153357312	30	Bachelor	المنطقة الشرقية	Urban	2	2	0.666667	y		y	2	2	2	2	2				1				#REF!	1	11
6087414310	153357312	34	Bachelor	المنطقة الشرقية	Urban	3	3	3.5	N		N	0	1	0	0	0						0		#REF!	0	1
6087414187	153357312	29	Bachelor	المنطقة الشرقية	Rural	5	3	0.109589	y		y	2	2	2	2	2						0		#REF!	0	10
6087413802	153357312	33	Diploma	المنطقة الشرقية	Urban	1	1	3	N	3	N	2	2	1	2	2						0		#REF!	0	9
6087413507	153357312	36	Bachelor	المنطقة الشرقية	Urban	3	2	0.333333	y		y	2	2	2	2	2	1			1				#REF!	2	12
6087413380	153357312	39	Bachelor	المنطقة الشرقية	Urban	3	3	6	y		y	2	1	1	0	1						0		#REF!	0	5
6087413016	153357312	36	Bachelor	المنطقة الشرقية	Rural	6	6	3	N		N	2	1	0	0	0						0		#REF!	0	3
6087412553	153357312	26	Bachelor	المنطقة الشرقية	Rural	1	0	-	N		N	2	1	2	2	2	1							#REF!	1	10
6087412524	153357312	21	Bachelor	المنطقة الشرقية	Urban	1	1	0.166667	y		y	2	0	0	1	0						0		#REF!	0	3
6087412275	153357312	31	Post graduate	المنطقة الشرقية	Urban	2	2	2.5	N		N	2	2	2	2	2	1							#REF!	1	11
6087411998	153357312	28	Bachelor	المنطقة الشرقية	Urban	3	2	4	N	6	N	2	2	2	2	2				1				#REF!	1	11
6087411934	153357312	40	Bachelor	المنطقة الشرقية	Rural	3	18	9	N		N	0	2	2	2	0	1							#REF!	1	7
6087411927	153357312	34	Bachelor	المنطقة الشرقية	Urban	2	2	3.75	N		N	2	2	0	0	0						0		#REF!	0	4
6087411696	153357312	32	Secondary school	المنطقة الشرقية	Rural	5	4	0.333333	y		y	0	2	1	2	1						0		#REF!	0	6
6087411463	153357312	40	Bachelor	المنطقة الشرقية	Urban	4	4	2	N		N	1	1	1	1	1	1			1	1			#REF!	2	7
6087411392	153357312	33	Secondary school	المنطقة الشرقية	Urban	3	2	5	N		N	2	2	2	2	2	1							#REF!	1	11
6087411323	153357312	45	Primary school	المنطقة الشرقية	Rural	10	12	1	y		y	1	0	1	1	2						0		#REF!	0	5
6087411245	153357312	37	Bachelor	المنطقة الشرقية	Urban	3	2	5	N	3	N	2	2	1	2	2						0		#REF!	0	9
6087411232	153357312	32	Secondary school	المنطقة الشرقية	Rural	5	4	0.333333	y		y													#REF!	0
6087411093	153357312	22	Diploma	المنطقة الشرقية	Urban	2	1	3	N	4	N	2	2	2	2	2				1				#REF!	1	11
6087411025	153357312	30	Post graduate	المنطقة الشرقية	Urban	2	2	3	N		N	2	1	0	0	0				1				#REF!	1	4
6087410992	153357312	30	Secondary school	المنطقة الشرقية	Urban	3	2	5	N		N	2	2	2	2	2	1							#REF!	1	11
6087410818	153357312	35	Bachelor	مكة المكرمة	Urban	3	3	2	N		N	2	1	1	1	0								#REF!	0	5
6087410754	153357312	34	Diploma	المنطقة الشرقية	Urban	3	3	7	N		N	2	1	0	0	0						0		#REF!	0	3
6087410730	153357312	33	Secondary school	المنطقة الشرقية	Urban	3	2	5	N		N	2	2	2	2	2	1							#REF!	1	11
6087410711	153357312	30	Bachelor	المنطقة الشرقية	Urban	1	2	2	N		N	1	1	1	1	0						0		#REF!	0	4
6087410574	153357312	28	Bachelor	المنطقة الشرقية	Urban	1	1	2	N		N	2	1	1	2	2	1							#REF!	1	9
6087410473	153357312	45	Intermediate school	المنطقة الشرقية	Urban	6	4	3	N		N	2	2	2	2	2					1			#REF!	1	11
6087410398	153357312	35	Secondary school	المنطقة الشرقية	Rural	3	3	8	N		N													#REF!	0
6087409902	153357312	27	Secondary school	المنطقة الشرقية	Urban	3	3	3	N		N	2	1	1	1	1						0		#REF!	0	6
6087409854	153357312	33	Post graduate	مكة المكرمة	Urban	2	2	1	y		y	2	2	2	2	2				1				#REF!	1	11
6087409663	153357312	41	Bachelor	المنطقة الشرقية	Urban	6	6	3	N		N	1	0	0	0	0						0		#REF!	0	1
6087409152	153357312	31	Bachelor	المنطقة الشرقية	Urban	4	3	2	N		N	2	2	2	2	2						0		#REF!	0	10
6087409040	153357312	34	Secondary school	المنطقة الشرقية	Urban	4	3	5	N		N	1	2	2	1	2	1							#REF!	1	9
6087408928	153357312	34	Bachelor	المنطقة الشرقية	Rural	3	2	5	N	3	N	0	2	2	2	2	1	1	1	1	1			#REF!	2	10
6087408630	153357312	45	Secondary school	مكة المكرمة	Urban	5	5	10	N		N	2	2	2	2	2						0		#REF!	0	10
6087408543	153357312	37	Bachelor	المنطقة الشرقية	Urban	4	3	0.416667	y		y	2	2	2	2	2	1			1				#REF!	2	12
6087408536	153357312	49	Secondary school	المنطقة الشرقية	Urban	3	3	23	N		N													#REF!	0
6087408465	153357312	30	Post graduate	المنطقة الشرقية	Rural	1	1	1	N		N	2	2	2	2	2	1							#REF!	1	11
6087408044	153357312	30	Bachelor	المنطقة الشرقية	Urban	4	4	0.0410959	y		y	1	1	0	0	0						0		#REF!	0	2
6087408012	153357312	38	Bachelor	المنطقة الشرقية	Urban	4	2	5	N		N	2	1	2	1	2						0		#REF!	0	8
6087407912	153357312	37	Secondary school	المنطقة الشرقية	Urban	6	4	4	N		N	1	0	0	0	0						0		#REF!	0	1
6087407776	153357312	33	Secondary school	المنطقة الشرقية	Urban	2	2	5	N		N	0	0	0	0	1						0		#REF!	0	1
6087407624	153357312	23	Secondary school	المنطقة الشرقية	Urban	2	2	2	N		N	2	1	1	0	1						0		#REF!	0	5
6087407605	153357312	35	Bachelor	المنطقة الشرقية	Urban	3	3	2	N		N	2	2	2	2	2						0		#REF!	0	10
6087407532	153357312	36	Post graduate	المنطقة الشرقية	Urban	6	6	6	N		N	2	0	0	1	0						0		#REF!	0	3
6087407487	153357312	36	Bachelor	المنطقة الشرقية	Urban	3	3	2	N		N													#REF!	0
6087407426	153357312	30	Bachelor	المنطقة الشرقية	Rural	4	4	3	N		N	2	1	0	0	0						0		#REF!	0	3
6087407177	153357312	37	Secondary school	المنطقة الشرقية	Urban	5	4	1.25	y		y	0	2	2	2	0	1			1				#REF!	2	8
6087407149	153357312	43	Intermediate school	المنطقة الشرقية	Rural	4	1	-	N		N	2	2	2	2	0	1			1	1			#REF!	2	10
6087407078	153357312	30	Post graduate	المنطقة الشرقية	Urban	2	2	5	N		N	2	1	0	0	1				1	1			#REF!	2	6
6087406953	153357312	34	Bachelor	المنطقة الشرقية	Urban	4	3	5	N	3	N	2	2	2	2	2	1		1	1	1			#REF!	2	12
6087406865	153357312	33	Secondary school	المنطقة الشرقية	Urban	1	6	8	N		N	2	2	2	2	2	1				1			#REF!	2	12
6087406722	153357312	27	Bachelor	المنطقة الشرقية	Urban	3	2	2	N	5	N	2	1	1	2	1				1				#REF!	1	8
6087406604	153357312	29	Bachelor	المنطقة الشرقية	Rural	2	2	1.5	N		N	0	2	2	2	2						0		#REF!	0	8
6087406350	153357312	33	Bachelor	المنطقة الشرقية	Urban	4	3	1	y	2	y	1	0	0	0	1						0		#REF!	0	2
6087406013	153357312	30	Diploma	المنطقة الشرقية	Rural	4	3	3	N		N	0	2	0	0	0						0		#REF!	0	2
6087405851	153357312	36	Secondary school	المنطقة الشرقية	Urban	5	5	2	N		N	1	1	0	0	1						0		#REF!	0	3
6087405836	153357312	31	Post graduate	المنطقة الشرقية	Urban	2	2	2	N		N	2	2	2	2	2	1		1					#REF!	2	12
6087405713	153357312	33	Bachelor	المنطقة الشرقية	Rural	4	3	1	y		y	1	1	1	1	1	1							#REF!	1	6
6087405665	153357312	25	Secondary school	المنطقة الشرقية	Rural	5	3	2.16667	N	7	N	0	0	0	0	0						0		#REF!	0	0
6087405656	153357312	42	Secondary school	المنطقة الشرقية	Urban	4	3	11	N		N	2	2	2	2	2				1				#REF!	1	11
6087405634	153357312	23	Bachelor	المنطقة الشرقية	Urban	1	1	0.75	y		y	1	0	0	0	1						0		#REF!	0	2
6087405401	153357312	37	Bachelor	المنطقة الشرقية	Urban	2	3	4	N		N	2	1	1	2	1						0		#REF!	0	7
6087405245	153357312	40	Diploma	المنطقة الشرقية	Rural	8	5	5	N	5	N	1	2	2	2	0	1							#REF!	1	8
6087405007	153357312	30	Diploma	المنطقة الشرقية	Urban	3	3	0.123288	y		y	2	2	2	2	2	1			1	1			#REF!	2	12
6087404889	153357312	33	Bachelor	المنطقة الشرقية	Urban	1	1	7	N	9	N	2	2	2	2	2	1							#REF!	1	11
6087404827	153357312	30	Bachelor	المنطقة الشرقية	Urban	1	1	1	N		N	2	1	0	1	2						0		#REF!	0	6
6087404525	153357312	40	Bachelor	المنطقة الشرقية	Urban	6	5	11	N		N	0	1	0	0	0	1				1			#REF!	2	3
6087404509	153357312	34	Bachelor	المنطقة الشرقية	Urban	2	2	6	N		N	1	1	0	0	0						0		#REF!	0	2
6087404450	153357312	40	Post graduate	المنطقة الشرقية	Urban	3	3	5	N		N	1	1	1	1	1						0		#REF!	0	5
6087404241	153357312	38	Diploma	المنطقة الشرقية	Urban	4	3	6	N	8	N	1	0	0	0	0						0		#REF!	0	1
6087404128	153357312	35	Bachelor	المنطقة الشرقية	Rural	2	2	5	N		N	2	2	2	2	2	1							#REF!	1	11
6087404119	153357312	40	Bachelor	المنطقة الشرقية	Urban	3	2	10	N		N	1	0	0	0	1						0		#REF!	0	2
6087404098	153357312	42	Bachelor	المنطقة الشرقية	Urban	4	3	6	N		N	2	0	2	2	2						0		#REF!	0	8
6087403991	153357312	44	Intermediate school	المنطقة الشرقية	Urban	8	3	5	N		N	1	0	0	0	0						0		#REF!	0	1
6087403983	153357312	47	Bachelor	المنطقة الشرقية	Urban	4	3	4	N		N													#REF!	0
6087403892	153357312	38	Diploma	المنطقة الشرقية	Urban	4	3	4	N		N	2	2	2	2	2					1			#REF!	1	11
6087403762	153357312	37	Bachelor	المنطقة الشرقية	Urban	3	3	3	N		N	1	1	0	1	0	1		1	1	1			#REF!	2	5
6087403703	153357312	26	Bachelor	مكة المكرمة	Urban	3	3	2	y		y													#REF!	0
6087403650	153357312	28	Bachelor	المنطقة الشرقية	Urban	1	1	1.5	y		y	1	2	2	2	2	1			1	1			#REF!	2	11
6087403487	153357312	35	Bachelor	المنطقة الشرقية	Rural	4	2	4	N		N	2	1	1	2	1						0		#REF!	0	7
6087403167	153357312	48	Secondary school	المنطقة الشرقية	Rural	12	8	12	N		N													#REF!	0
6087403146	153357312	42	Bachelor	المنطقة الشرقية	Rural	4	5	8	N		N	2	2	2	2	2						0		#REF!	0	10
6087403121	153357312	37	Bachelor	المنطقة الشرقية	Urban	5	3	6	y		y	1	2	1	2	2						0		#REF!	0	8
6087402131	153357312	27	Bachelor	المنطقة الشرقية	Urban	2	2	5	N		N	2	1	0	0	0						0		#REF!	0	3
6087402082	153357312	46	Diploma	المنطقة الشرقية	Urban	5	5	10	N		N	0	2	2	2	2	1			1	1			#REF!	2	10
6087402061	153357312	35	Bachelor	المنطقة الشرقية	Urban	5	4	0.333333	y		y	1	2	1	1	1					1			#REF!	1	7
6087401907	153357312	28	Bachelor	المنطقة الشرقية	Urban	2	2	3	N		N	2	2	2	2	2	1				1			#REF!	2	12
6087401774	153357312	38	Post graduate	الرياض	Urban	4	4	7	N		N	1	2	0	0	1						0		#REF!	0	4
6087401761	153357312	34	Bachelor	المنطقة الشرقية	Urban	3	2	2.83333	N		N	2	2	2	2	2	1							#REF!	1	11
6087401716	153357312	32	Diploma	المنطقة الشرقية	Urban	3	2	3	N		N	2	2	2	2	2	1			1				#REF!	2	12
6087401565	153357312	49	Bachelor	المنطقة الشرقية	Urban	3	3	12	N		N	0	0	0	0	1						0		#REF!	0	1
6087401458	153357312	30	Diploma	المنطقة الشرقية	Rural	2	2	4	N		N	0	2	1	1	2					1			#REF!	1	7
6087401270	153357312	30	Bachelor	المنطقة الشرقية	Urban	3	2	3	N		N	2	2	2	2	2	1							#REF!	1	11
6087401120	153357312	33	Bachelor	المنطقة الشرقية	Urban	2	2	4	N		N	1	0	0	0	0						0		#REF!	0	1
6087401004	153357312	26	Bachelor	المنطقة الشرقية	Urban	1	1	2	N		N													#REF!	0
6087400945	153357312	25	Secondary school	المنطقة الشرقية	Rural	2	1	2.41667	N		N	2	1	1	1	0						0		#REF!	0	5
6087400804	153357312	28	Secondary school	المنطقة الشرقية	Rural	4	3	3	N		N	0	1	1	1	1						0		#REF!	0	4
6087400353	153357312	30	Bachelor	المنطقة الشرقية	Urban	1	1	2.66667	N		N	2	2	2	2	2	1							#REF!	1	11
6087400317	153357312	40	Bachelor	المنطقة الشرقية	Rural	4	4	4	N		N	1	1	0	0	0						0		#REF!	0	2
6087400190	153357312	31	Bachelor	المنطقة الشرقية	Urban	3	1	5	N		N	2	2	1	1	0						0		#REF!	0	6
6087400079	153357312	35	Bachelor	المنطقة الشرقية	Urban	5	4	4	N		N	1	0	0	0	1						0		#REF!	0	2
6087400011	153357312	40	Secondary school	المنطقة الشرقية	Urban	5	4	8	N		N	2	2	2	2	2						0		#REF!	0	10
6087399904	153357312	37	Bachelor	المنطقة الشرقية	Urban	4	4	2	N		N	1	1	0	1	1						0		#REF!	0	4
6087399890	153357312	37	Bachelor	المنطقة الشرقية	Urban	3	3	3	y		y	1	1	0	0	1						0		#REF!	0	3
6087399444	153357312	28	Diploma	المنطقة الشرقية	Urban	2	2	4	N	3	N	2	2	2	2	2				1				#REF!	1	11
6087399395	153357312	37	Post graduate	المنطقة الشرقية	Urban	3	3	3	N		N	1	1	1	1	0						0		#REF!	0	4
6087399305	153357312	35	Bachelor	المنطقة الشرقية	Urban	5	4	1.33333	N		N	2	1	2	2	2						0		#REF!	0	9
6087399268	153357312	36	Secondary school	المنطقة الشرقية	Urban	4	4	2.66667	N		N	2	2	2	2	2	1							#REF!	1	11
6087398951	153357312	28	Diploma	المنطقة الشرقية	Rural	2	2	4	N		N	2	2	1	1	1						0		#REF!	0	7
6087398913	153357312	29	Post graduate	المنطقة الشرقية	Urban	1	0	0	N	4	N	2	2	2	2	2						0		#REF!	0	10
6087398757	153357312	48	Post graduate	المنطقة الشرقية	Urban	6	5	13	N		N	2	2	2	2	2	1			1				#REF!	2	12
6087398752	153357312	30	Bachelor	المنطقة الشرقية	Urban	3	3	0.583333	N		N	2	1	0	1	1				1				#REF!	1	6
6087398710	153357312	25	Bachelor	المنطقة الشرقية	Urban	1	0	-	N	6	N	2	2	2	2	2	1			1				#REF!	2	12
6087398475	153357312	32	Bachelor	المنطقة الشرقية	Urban	2	2	0.25	y		y	2	2	2	2	2	1				1			#REF!	2	12
6087398294	153357312	35	Post graduate	المنطقة الشرقية	Rural	4	1	8	N	4	N	2	2	2	2	2	1			1	1			#REF!	2	12
6087398125	153357312	40	Secondary school	المنطقة الشرقية	Rural	5	5	2	N		N	2	2	2	2	2						0		#REF!	0	10
6087397358	153357312	27	Diploma	المنطقة الشرقية	Urban	2	2	1.08333	y		y	2	1	1	1	1	1							#REF!	1	7
6087397329	153357312	37	Bachelor	المنطقة الشرقية	Urban	5	4	5	N		N	1	1	1	1	2						0		#REF!	0	6
6087397083	153357312	28	Diploma	المنطقة الشرقية	Rural	5	3	0.75	y		y	2	2	2	2	2					1			#REF!	1	11
6087396651	153357312	29	Secondary school	المنطقة الشرقية	Rural	4	2	3	N		N	2	1	2	0	1						0		#REF!	0	6
6087396076	153357312	22	Secondary school	المنطقة الشرقية	Urban	2	2	0.666667	y		y	1	1	0	1	1						0		#REF!	0	4
6087395822	153357312	38	Bachelor	المنطقة الشرقية	Urban	4	4	6	N		N	1	1	1	1	1						0		#REF!	0	5
6087395614	153357312	46	Bachelor	المنطقة الشرقية	Urban	9	15	6	N		N	1	1	2	2	2						0		#REF!	0	8
6087394898	153357312	30	Diploma	المنطقة الشرقية	Urban	4	3	9	N		N	1	1	0	0	0						0		#REF!	0	2
6087394895	153357312	28	Diploma	المنطقة الشرقية	Rural	1	1	6	N		N	2	2	2	2	2						0	1	#REF!	1	11
6087394571	153357312	30	Bachelor	المنطقة الشرقية	Urban	2	2	2	N		N	2	1	0	0	1						0		#REF!	0	4
6087394570	153357312	43	Secondary school	المنطقة الشرقية	Urban	8	8	4	N		N	2	0	0	0	0						0		#REF!	0	2
6087394491	153357312	33	Bachelor	المنطقة الشرقية	Urban	4	5	0.916667	y		y	0	0	0	0	0						0		#REF!	0	0
6087394420	153357312	36	Secondary school	المنطقة الشرقية	Rural	4	4	1.16667	N	3	N	0	0	0	0	0						0		#REF!	0	0
6087394279	153357312	34	Bachelor	المنطقة الشرقية	Urban	1	1	4	N		N	2	2	0	1	0						0		#REF!	0	5
6087394256	153357312	33	Bachelor	المنطقة الشرقية	Urban	2	3	5	N		N	1	0	0	0	0						0		#REF!	0	1
6087393875	153357312	32	Post graduate	المنطقة الشرقية	Urban	3	3	1	y		y	2	2	2	2	2	1				1			#REF!	2	12
6087393854	153357312	36	Post graduate	المنطقة الشرقية	Urban	3	3	0.5	y		y	2	2	2	2	2	1							#REF!	1	11
6087392965	153357312	45	Post graduate	الرياض	Urban	8	5	12	N		N													#REF!	0
6087392372	153357312	40	Post graduate	المنطقة الشرقية	Urban	2	3	15	N		N	1	0	0	0	0	1							#REF!	1	2
6087392322	153357312	31	Bachelor	المنطقة الشرقية	Urban	2	1	3	N	3	N	2	1	2	2	2						0		#REF!	0	9
6087391302	153357312	28	Diploma	المنطقة الشرقية	Rural	1	1	6	N		N	2	2	2	2	2						0	1	#REF!	1	11
6087391121	153357312	31	Bachelor	الجوف	Rural	3	2	4	N		N	1	1	0	0	1						0		#REF!	0	3
6087391041	153357312	41	Bachelor	المنطقة الشرقية	Urban	5	4	0.333333	y		y	0	0	0	0	0						0		#REF!	0	0
6087391006	153357312	35	Bachelor	المنطقة الشرقية	Urban	4	2	5	N		N	2	2	2	2	2	1			1	1			#REF!	2	12
6087390936	153357312	30	Bachelor	المنطقة الشرقية	Urban	2	2	0.0833333	y		y	2	1	1	1	1						0		#REF!	0	6
6087390910	153357312	36	Secondary school	المنطقة الشرقية	Urban	3	3	0.333333	y		y	2	1	2	2	2	1						1	#REF!	2	11
6087390741	153357312	30	Bachelor	المنطقة الشرقية	Rural	3	3	0.416667	N		N	2	1	0	1	0	1							#REF!	1	5
6087390279	153357312	32	Bachelor	المنطقة الشرقية	Urban	4	4	0	N		N	2	2	2	2	2	1			1	1			#REF!	2	12
6087389892	153357312	30	Secondary school	المنطقة الشرقية	Rural	3	2	3	N		N	2	2	2	2	2						0		#REF!	0	10
6087388929	153357312	37	Bachelor	المنطقة الشرقية	Urban	6	5	3	N	5	N	2	0	0	0	1						0		#REF!	0	3
6087388184	153357312	27	Bachelor	المنطقة الشرقية	Urban	3	3	2.5	N		N	0	1	0	0	0						0		#REF!	0	1
6087387458	153357312	25	Secondary school	المنطقة الشرقية	Rural	2	2	2.41667	N		N	2	1	0	1	0						0		#REF!	0	4
6087387339	153357312	41	Secondary school	المنطقة الشرقية	Rural	2	3	1	y		y	0	0	0	0	1						0		#REF!	0	1
6087385934	153357312	34	Post graduate	الرياض	Urban	3	2	0.166667	y		y	2	2	2	2	2	1			1	1			#REF!	2	12
6087385257	153357312	23	Bachelor	المنطقة الشرقية	Urban	1	1	2	N		N													#REF!	0
6087383602	153357312	37	Secondary school	المنطقة الشرقية	Urban	5	2	3	N	6	N	2	1	2	2	2	1							#REF!	1	10
6087383050	153357312	30	Diploma	المنطقة الشرقية	Urban	2	2	3	N		N	2	1	2	1	1						0		#REF!	0	7
6087382939	153357312	25	Bachelor	المنطقة الشرقية	Urban	1	1	0.25	y		y	2	2	2	2	2	1				1			#REF!	2	12
6087381799	153357312	50	Intermediate school	المنطقة الشرقية	Rural	7	6	23	N		N	1	0	1	2	2	1					0	1	#REF!	2	8
6087380769	153357312	28	Secondary school	المنطقة الشرقية	Urban	3	3	2	N		N	2	2	1	1	2						0		#REF!	0	8
6087377275	153357312	48	Post graduate	المنطقة الشرقية	Urban	5	3	8	N		N	2	1	2	2	2							1	#REF!	1	10
6087376337	153357312	24	Bachelor	المنطقة الشرقية	Rural	1	1	2	N		N													#REF!	0
6087375175	153357312	39	Bachelor	المنطقة الشرقية	Urban	5	4	3	N		N	2	2	2	2	2						0		#REF!	0	10
6087370392	153357312	20	Secondary school	المنطقة الشرقية	Urban	1	1	0.333333	y		y	2	2	2	1	2	1							#REF!	1	10
6087369866	153357312	27	Post graduate	المنطقة الشرقية	Urban	3	2	2	N		N	2	2	2	2	2	1							#REF!	1	11
6087369780	153357312	31	Post graduate	المنطقة الشرقية	Urban	2	2	6	N		N	1	0	0	0	1						0		#REF!	0	2
6087369373	153357312	38	Bachelor	المنطقة الشرقية	Rural	1	1	1	N		N	2	2	2	2	2	1			1				#REF!	2	12
6087369117	153357312	33	Bachelor	المنطقة الشرقية	Urban	2	2	0.0833333	y		y													#REF!	0
6087368882	153357312	29	Diploma	المنطقة الشرقية	Urban	1	1	5	N	6	N	2	2	1	1	2	1				1			#REF!	2	10
6087367702	153357312	27	Post graduate	المنطقة الشرقية	Rural	3	1	12	y	4	y	2	2	2	2	2	1			1			1	#REF!	2	12
6087364561	153357312	28	Bachelor	المنطقة الشرقية	Urban	2	2	2	N		N	0	1	0	1	0						0		#REF!	0	2
6087363784	153357312	21	Secondary school	المنطقة الشرقية	Urban	1	1	0.916667	N		N													#REF!	0
6087363055	153357312	38	Bachelor	المنطقة الشرقية	Urban	8	5	0.833333	y		y	1	2	2	2	1	1					0		#REF!	1	9
6087362899	153357312	25	Bachelor	نجران	Urban	1	1	3	N		N	2	1	0	1	2						0		#REF!	0	6
6087359499	153357312	34	Bachelor	المنطقة الشرقية	Rural	5	5	0.916667	y		y	2	2	2	2	2	1			1	1		1	#REF!	2	12
6087357211	153357312	26	Secondary school	المنطقة الشرقية	Urban	3	3	0.916667	y		y	2	2	2	2	0						0		#REF!	0	8
6087355988	153357312	35	Post graduate	المنطقة الشرقية	Urban	3	3	0.25	y		y	2	2	2	1	2						0		#REF!	0	9
6087355952	153357312	34	Bachelor	المنطقة الشرقية	Rural	5	2	0.916667	y		y													#REF!	0
6087353277	153357312	38	Secondary school	المنطقة الشرقية	Urban	7	6	0.060274	y		y	1	0	0	0	0						0		#REF!	0	1
6087349437	153357312	30	Secondary school	المنطقة الشرقية	Urban	4	4	0.416667	y		y													#REF!	0
6087348874	153357312	25	Bachelor	المنطقة الشرقية	Urban	1	1	1.5	N		N	2	0	0	0	1						0		#REF!	0	3
6087347984	153357312	41	Secondary school	المنطقة الشرقية	Urban	4	4	10	N		N	2	1	1	1	2						0		#REF!	0	7
6087344767	153357312	35	Bachelor	المنطقة الشرقية	Urban	4	4	0.75	y		y	2	2	2	2	2							1	#REF!	1	11
6087342599	153357312	24	Bachelor	المنطقة الشرقية	Urban	2	2	2	N		N	2	1	1	1	1	1				1			#REF!	2	8
6087340964	153357312	31	Diploma	المنطقة الشرقية	Urban	2	2	3	N		N	2	2	2	2	2		1						#REF!	1	11
6087337984	153357312	35	Bachelor	المنطقة الشرقية	Rural	2	2	0.416667	y		y	1	0	0	0	0						0		#REF!	0	1
6087337707	153357312	30	Diploma	المنطقة الشرقية	Rural	4	3	4	N	7	N	2	1	1	1	1						0		#REF!	0	6
6087337211	153357312	37	Bachelor	المنطقة الشرقية	Urban	5	5	0.166667	y		y	2	2	1	1	0	1				1			#REF!	2	8
6087335874	153357312	33	Post graduate	المدينة المنورة	Urban	2	2	1.33333	y		y	2	1	1	1	0	1							#REF!	1	6
6087334230	153357312	39	Secondary school	المنطقة الشرقية	Urban	6	5	6	N		N	1	2	1	2	2	1							#REF!	1	9
6087333779	153357312	30	Diploma	المنطقة الشرقية	Urban	2	1	1.41667	y	3	y	2	2	2	2	2						0		#REF!	0	10
6087331129	153357312	29	Diploma	المنطقة الشرقية	Urban	2	2	0.0833333	y		y	2	2	2	2	2	1			1				#REF!	2	12
6087331053	153357312	26	Bachelor	المنطقة الشرقية	Rural	3	2	0.833333	y		y	1	1	0	1	0						0		#REF!	0	3
6087330436	153357312	30	Bachelor	المنطقة الشرقية	Urban	3	3	2.33333	N		N	2	0	0	0	0						0		#REF!	0	2
6087329777	153357312	20	Secondary school	المنطقة الشرقية	Urban	1	1	0.583333	y		y	2	2	1	2	2						0		#REF!	0	9
6087329069	153357312	15	Primary school	الرياض	Urban	1	0	1	N		N													#REF!	0
6087328878	153357312	38	Secondary school	المنطقة الشرقية	Rural	5	4	0.583333	y		y	1	0	0	1	0						0		#REF!	0	2
6087328134	153357312	25	Bachelor	المنطقة الشرقية	Urban	2	2	1	y		y	1	1	0	0	1						0		#REF!	0	3
6087328019	153357312	23	Secondary school	المنطقة الشرقية	Urban	1	1	0.5	y		y	2	2	2	1	2						0		#REF!	0	9
6087327669	153357312	32	Post graduate	المدينة المنورة	Urban	2	2	1.5	N		N	2	2	2	2	2	1			1				#REF!	2	12
6087327658	153357312	31	Post graduate	المدينة المنورة	Urban	2	2	1.33333	N		N	2	2	2	2	2	1			1				#REF!	2	12
6087327419	153357312	27	Diploma	المنطقة الشرقية	Rural	3	2	3	N	2	N	0	0	0	0	1						0		#REF!	0	1
6087326797	153357312	31	Post graduate	المدينة المنورة	Urban	4	2	1.5	N		N	2	2	2	2	2	1							#REF!	1	11
6087326613	153357312	31	Bachelor	المنطقة الشرقية	Urban	4	2	4	N	3	N	2	1	2	2	2	1			1				#REF!	2	11
6087326290	153357312	30	Post graduate	المدينة المنورة	Urban	4	3	0.916667	y		y	2	2	2	2	2	1		1					#REF!	2	12
6087326256	153357312	40	Secondary school	مكة المكرمة	Urban	4	3	14	N		N	2	2	1	1	1	1							#REF!	1	8
6087325868	153357312	26	Diploma	المنطقة الشرقية	Urban	3	3	0.25	y		y	1	1	0	1	0						0		#REF!	0	3
6087325853	153357312	32	Post graduate	مكة المكرمة	Urban	3	3	3	N		N	2	2	2	2	2	1	1	1					#REF!	2	12
6087325605	153357312	26	Bachelor	المنطقة الشرقية	Urban	2	2	2.5	N		N	2	1	1	2	2						0		#REF!	0	8
6087325432	153357312	29	Diploma	المنطقة الشرقية	Urban	1	1	0.833333	y		y	2	2	1	1	0						0		#REF!	0	6
6087325037	153357312	33	Bachelor	المنطقة الشرقية	Urban	3	2	0.25	y		y	2	1	0	0	1						0		#REF!	0	4
6087324583	153357312	27	Bachelor	المنطقة الشرقية	Urban	3	3	0.0575342	y		y	1	1	0	0	0						0		#REF!	0	2
6087324357	153357312	28	Bachelor	المنطقة الشرقية	Rural	1	1	3	N		N	1	1	1	1	1						0		#REF!	0	5
6087323943	153357312	30	Bachelor	المنطقة الشرقية	Rural	2	2	2	N		N	2	1	1	2	0						0		#REF!	0	6
6087323937	153357312	28	Diploma	المنطقة الشرقية	Urban	2	2	4	N		N	2	2	0	1	1						0		#REF!	0	6
6087323860	153357312	48	Diploma	مكة المكرمة	Urban	6	7	9	N		N	0	1	2	2	2	1							#REF!	1	8
6087323438	153357312	32	Bachelor	المنطقة الشرقية	Urban	2	2	3	N		N	2	2	1	2	2				1				#REF!	1	10
6087323302	153357312	24	Bachelor	المنطقة الشرقية	Urban	1	1	1.75	y		y	2	1	1	1	0						0		#REF!	0	5
6087323202	153357312	29	Secondary school	المنطقة الشرقية	Rural	2	1	3	N		N	2	1	2	2	2							1	#REF!	1	10
6087322924	153357312	35	Bachelor	المنطقة الشرقية	Urban	1	0	1	N	5	N	1	1	0	1	1	1							#REF!	1	5
6087322369	153357312	30	Secondary school	الرياض	Urban	3	3	3	N		N	2	2	2	2	2	1							#REF!	1	11
6087322327	153357312	33	Diploma	المنطقة الشرقية	Urban	1	1	5	N		N	2	2	2	2	2	1							#REF!	1	11
6087322304	153357312	31	Secondary school	المنطقة الشرقية	Urban	3	4	5	N		N	2	2	2	2	0						0		#REF!	0	8
6087321935	153357312	27	Bachelor	المنطقة الشرقية	Urban	3	3	0.75	y		y	2	0	1	0	1						0		#REF!	0	4
6087321339	153357312	41	Bachelor	المنطقة الشرقية	Urban	6	5	4	N		N	2	2	2	2	2						0		#REF!	0	10
6087321199	153357312	33	Bachelor	المنطقة الشرقية	Urban	3	2	8.58333	N	7	N	2	2	2	2	2				1	1			#REF!	2	12
6087320318	153357312	27	Secondary school	المنطقة الشرقية	Rural	2	1	7	N	6	N	2	2	2	2	2					1			#REF!	1	11
6087320260	153357312	32	Diploma	المنطقة الشرقية	Urban	3	4	2	N		N													#REF!	0
6087318455	153357312	49	Diploma	المنطقة الشرقية	Urban	5	5	10	N		N													#REF!	0
6087317226	153357312	22	Bachelor	المنطقة الشرقية	Urban	1	1	2	N		N	1	2	0	0	1						0		#REF!	0	4
6087316967	153357312	27	Secondary school	المنطقة الشرقية	Urban	3	2	3	N		N	2	0	0	0	1						0		#REF!	0	3
6087316899	153357312	39	Secondary school	مكة المكرمة	Urban	1	0	-	N		N													#REF!	0
6087316017	153357312	29	Bachelor	المنطقة الشرقية	Rural	3	3	0.5	y		y	1	1	1	2	2	1				1			#REF!	2	9
6087315759	153357312	29	Secondary school	الرياض	Urban	3	3	0.666667	y		y	2	2	2	2	0					1			#REF!	1	9
6087315340	153357312	22	Diploma	المنطقة الشرقية	Urban	1	1	1.66667	N		N	2	1	1	1	2						0		#REF!	0	7
6087315331	153357312	28	Post graduate	المنطقة الشرقية	Urban	1	1	0.833333	N		N	2	1	2	2	2	1			1	1			#REF!	2	11
6087315246	153357312	47	Bachelor	المنطقة الشرقية	Urban	5	4	4.25	N		N	0	1	2	2	2						0		#REF!	0	7
6087314996	153357312	33	Bachelor	المنطقة الشرقية	Urban	4	4	2	N		N	2	1	0	0	0						0		#REF!	0	3
6087314944	153357312	34	Bachelor	المنطقة الشرقية	Urban	3	3	3	N		N	1	1	0	0	1						0		#REF!	0	3
6087314026	153357312	34	Diploma	المنطقة الشرقية	Urban	2	2	6	N		N	1	2	1	1	0						0		#REF!	0	5
6087313780	153357312	45	Secondary school	المنطقة الشرقية	Urban	3	3	18	N		N	1	0	0	0	0					1			#REF!	1	2
6087313764	153357312	28	Post graduate	المنطقة الشرقية	Urban	1	1	0.833333	N		N													#REF!	0
6087313591	153357312	28	Bachelor	المنطقة الشرقية	Urban	3	4	3	y		y	2	1	1	1	2	1				1			#REF!	2	9
6087313181	153357312	30	Post graduate	المنطقة الشرقية	Urban	2	2	4	N		N	2	2	1	1	2	1							#REF!	1	9
6087313162	153357312	38	Bachelor	المنطقة الشرقية	Rural	3	3	4	N		N	2	2	2	2	2	1			1				#REF!	2	12
6087312975	153357312	30	Bachelor	المنطقة الشرقية	Urban	2	2	0.166667	y		y	1	1	0	0	1						0		#REF!	0	3
6087312355	153357312	32	Post graduate	الرياض	Urban	3	1	8	N	4	N	2	2	2	2	2	1			1				#REF!	2	12
6087312099	153357312	35	Bachelor	المنطقة الشرقية	Rural	4	4	0.0833333	y		y	1	0	0	0	0						0		#REF!	0	1
6087311807	153357312	34	Bachelor	المنطقة الشرقية	Urban	3	2	6	N	2	N	1	1	1	1	1							1	#REF!	1	6
6087311749	153357312	24	Bachelor	المنطقة الشرقية	Urban	2	1	2.5	N	9	N	2	1	0	0	1	1							#REF!	1	5
6087310587	153357312	35	Bachelor	المنطقة الشرقية	Rural	4	3	2	y		y	2	1	1	1	0						0		#REF!	0	5
6087310544	153357312	29	Post graduate	المنطقة الشرقية	Urban	3	2	3.66667	N		N	2	2	2	2	2						0		#REF!	0	10
6087309854	153357312	30	Bachelor	المنطقة الشرقية	Urban	0	0	0	N		N													#REF!	0
6087309575	153357312	34	Bachelor	عسير	Urban	4	3	0.166667	y		y	2	2	2	2	2						0		#REF!	0	10
6087309509	153357312	29	Bachelor	المنطقة الشرقية	Urban	2	2	0.666667	N		N	2	2	2	2	2	1				1			#REF!	2	12
6087309473	153357312	36	Bachelor	المنطقة الشرقية	Urban	3	3	5	N		N	2	0	0	0	0						0		#REF!	0	2
6087308719	153357312	37	Secondary school	المنطقة الشرقية	Rural	5	5	1.66667	N		N	1	1	1	1	0						0		#REF!	0	4
6087308203	153357312	37	Bachelor	المنطقة الشرقية	Urban	2	2	4.5	N		N	1	1	0	0	1						0		#REF!	0	3
6087308053	153357312	35	Diploma	المنطقة الشرقية	Urban	7	6	5	N		N	2	2	2	2	2	1							#REF!	1	11
6087307585	153357312	30	Secondary school	المنطقة الشرقية	Urban	3	3	2.5	N		N	0	1	2	0	1	1							#REF!	1	5
6087307047	153357312	27	Secondary school	المنطقة الشرقية	Urban	2	2	4	N		N	1	0	0	0	1						0		#REF!	0	2
6087305926	153357312	35	Bachelor	المنطقة الشرقية	Urban	2	2	2.41667	N		N	2	2	2	2	2						0		#REF!	0	10
6087305158	153357312	36	Bachelor	المنطقة الشرقية	Rural	3	3	6	N		N	1	2	2	2	1						0		#REF!	0	8
6087304041	153357312	32	Bachelor	المنطقة الشرقية	Urban	3	3	7	N		N	1	1	0	0	0						0		#REF!	0	2
6096165696	153357312	29	Bachelor	المنطقة الشرقية	Rural	2	2	2	N		N	كنا نستخدم مانع للحمل , لكن ليس في كل الممارسات الحميمية	جيد, لكنه ليس في الوقت المناسب تماما	لم أكن أنوي أن أحمل	لم كنت أرغب أن أرزق بطفل	لم نناقش مطلقا أن ننجب أطفاN فيما بيننا						لم أفعل أي مما تم ذكره أعNه قبل حملي
6095931018	153357312	23	Bachelor	المنطقة الشرقية	Urban	2	1	0.583333	y	3	N	لم نستخدم مانع للحمل	في الوقت المناسب	لم أكن أنوي أن أحمل	كانت لدي مشاعر مختلطه بأن أرزق بطفل	لم نناقش مطلقا أن ننجب أطفاN فيما بيننا						لم أفعل أي مما تم ذكره أعNه قبل حملي
6095921437	153357312
6095915765	153357312	33	Secondary school	المنطقة الشرقية	Rural	4	3	4	N		N	لم نستخدم مانع للحمل	جيد, لكنه ليس في الوقت المناسب تماما	نيتي بالحمل كانت متذبذبة	كانت لدي مشاعر مختلطه بأن أرزق بطفل	أنا وشريكي تناقشنا على أن ننجب أطفاN ما بيننا، ولكن لم أوافق أن أصبح حامN	أخذت حمض الفوليك
6095881425	153357312	49	Intermediate school	القصيم	Urban	6	6	13	N		N	لم نستخدم مانع للحمل	جيد, لكنه ليس في الوقت المناسب تماما	كنت أنوي أن أحمل	كنت أرغب أن أرزق بطفل	أنا وشريكي كنا متفقين على أن أصبح حامN	أخذت حمض الفوليك
6095879089	153357312
6095865471	153357312	20	Bachelor	المنطقة الشرقية	Rural	1	1	0.666667	N		y	لم نستخدم مانع للحمل	في الوقت المناسب	كنت أنوي أن أحمل	كنت أرغب أن أرزق بطفل	أنا وشريكي كنا متفقين على أن أصبح حامN	أخذت حمض الفوليك			أكلي أصبح صحيا أكثر	بحثت عن نصائح صحية/طبية
6095847348	153357312	39	Diploma	المنطقة الشرقية	Urban	4	1	5	y	2	N	لم نستخدم مانع للحمل	في وقت غير مناسب	نيتي بالحمل كانت متذبذبة	كانت لدي مشاعر مختلطه بأن أرزق بطفل	أنا وشريكي تناقشنا على أن ننجب أطفاN ما بيننا، ولكن لم أوافق أن أصبح حامN						لم أفعل أي مما تم ذكره أعNه قبل حملي
6095837086	153357312	26	Diploma	المنطقة الشرقية	Urban	2	2	0.166667	N		y	لم نستخدم مانع للحمل	في الوقت المناسب	نيتي بالحمل كانت متذبذبة	كانت لدي مشاعر مختلطه بأن أرزق بطفل	أنا وشريكي كنا متفقين على أن أصبح حامN					بحثت عن نصائح صحية/طبية
6095785535	153357312
6095782493	153357312	24	Secondary school	المنطقة الشرقية	Urban	2	1	2	N		N	لم نستخدم مانع للحمل	في الوقت المناسب	كنت أنوي أن أحمل	كنت أرغب أن أرزق بطفل	أنا وشريكي كنا متفقين على أن أصبح حامN			توقف زوجي عن التدخين بوجودي او داخل المنزل		بحثت عن نصائح صحية/طبية
6095653934	153357312	31	Bachelor	المنطقة الشرقية	Rural	4	4	6	N		y	لم نستخدم مانع للحمل	في وقت غير مناسب	لم أكن أنوي أن أحمل	لم كنت أرغب أن أرزق بطفل	أنا وشريكي تناقشنا على أن ننجب أطفاN ما بيننا، ولكن لم أوافق أن أصبح حامN						لم أفعل أي مما تم ذكره أعNه قبل حملي
6095560317	153357312	28	Secondary school	المنطقة الشرقية	Rural	3	2	1.5	N		y
6095473619	153357312	34	Secondary school	المنطقة الشرقية	Urban	1	1	1.5	N		N	لم نستخدم مانع للحمل	في الوقت المناسب	كنت أنوي أن أحمل	كنت أرغب أن أرزق بطفل	أنا وشريكي كنا متفقين على أن أصبح حامN					بحثت عن نصائح صحية/طبية
6095442075	153357312	31	Bachelor	المنطقة الشرقية	Urban	2	1	1.5	y	3	N	لم نستخدم مانع للحمل	جيد, لكنه ليس في الوقت المناسب تماما	كنت أنوي أن أحمل	كنت أرغب أن أرزق بطفل	أنا وشريكي كنا متفقين على أن أصبح حامN						لم أفعل أي مما تم ذكره أعNه قبل حملي
6095341044	153357312	35	Bachelor	المنطقة الشرقية	Urban	3	2	9.33333	y	9	N	لم نستخدم مانع للحمل	في الوقت المناسب	كنت أنوي أن أحمل	كنت أرغب أن أرزق بطفل	أنا وشريكي كنا متفقين على أن أصبح حامN					بحثت عن نصائح صحية/طبية
6095326336	153357312	29	Bachelor	المنطقة الشرقية	Urban	4	4	2.41667	N		y	لم نستخدم مانع للحمل	جيد, لكنه ليس في الوقت المناسب تماما	لم أكن أنوي أن أحمل	كانت لدي مشاعر مختلطه بأن أرزق بطفل	أنا وشريكي تناقشنا على أن ننجب أطفاN ما بيننا، ولكن لم أوافق أن أصبح حامN						لم أفعل أي مما تم ذكره أعNه قبل حملي
6095307550	153357312
6095292224	153357312	30	Bachelor	المنطقة الشرقية	Urban	2	2	2.5	N		N	كنا نستخدم مانع للحمل , لكن ليس في كل الممارسات الحميمية	في وقت غير مناسب	لم أكن أنوي أن أحمل	لم كنت أرغب أن أرزق بطفل	أنا وشريكي تناقشنا على أن ننجب أطفاN ما بيننا، ولكن لم أوافق أن أصبح حامN						لم أفعل أي مما تم ذكره أعNه قبل حملي
6095258109	153357312	34	Post graduate	مكة المكرمة	Urban	4	4	2	N		N
6095236005	153357312
6095228428	153357312	27	Secondary school	المنطقة الشرقية	Urban	3	2	2	N		N	كنا نستخدم مانع للحمل , لكن ليس في كل الممارسات الحميمية	جيد, لكنه ليس في الوقت المناسب تماما	نيتي بالحمل كانت متذبذبة	كانت لدي مشاعر مختلطه بأن أرزق بطفل	لم نناقش مطلقا أن ننجب أطفاN فيما بيننا						لم أفعل أي مما تم ذكره أعNه قبل حملي
6095197980	153357312	37	Bachelor	المنطقة الشرقية	Urban	4	3	4	y	6	y	لم نستخدم مانع للحمل	في وقت غير مناسب	لم أكن أنوي أن أحمل	لم كنت أرغب أن أرزق بطفل	أنا وشريكي تناقشنا على أن ننجب أطفاN ما بيننا، ولكن لم أوافق أن أصبح حامN						لم أفعل أي مما تم ذكره أعNه قبل حملي
6095190205	153357312	32	Diploma	المنطقة الشرقية	Urban	1	1	1	N		y	لم نستخدم مانع للحمل	في الوقت المناسب	كنت أنوي أن أحمل	كنت أرغب أن أرزق بطفل	أنا وشريكي كنا متفقين على أن أصبح حامN						لم أفعل أي مما تم ذكره أعNه قبل حملي
6095188123	153357312	36	Bachelor	المنطقة الشرقية	Urban	3	3	4	N		N	لم نستخدم مانع للحمل	في الوقت المناسب	كنت أنوي أن أحمل	كنت أرغب أن أرزق بطفل	أنا وشريكي كنا متفقين على أن أصبح حامN	أخذت حمض الفوليك			أكلي أصبح صحيا أكثر	بحثت عن نصائح صحية/طبية
6095185055	153357312
6095176598	153357312	21	Diploma	المنطقة الشرقية	Urban	2	1	8	N		y	لم نستخدم مانع للحمل	في الوقت المناسب	كنت أنوي أن أحمل	كنت أرغب أن أرزق بطفل	أنا وشريكي كنا متفقين على أن أصبح حامN						لم أفعل أي مما تم ذكره أعNه قبل حملي
6095173966	153357312
6095171587	153357312	31	Diploma	المنطقة الشرقية	Rural	2	1	3	y	5	N	كنا نستخدم مانع للحمل , لكن ليس في كل الممارسات الحميمية	جيد, لكنه ليس في الوقت المناسب تماما	لم أكن أنوي أن أحمل	كانت لدي مشاعر مختلطه بأن أرزق بطفل	أنا وشريكي تناقشنا على أن ننجب أطفاN ما بيننا، ولكن لم أوافق أن أصبح حامN						لم أفعل أي مما تم ذكره أعNه قبل حملي
6095162586	153357312
6095159201	153357312	31	Diploma	المنطقة الشرقية	Urban	4	2	5	N		y	لم نستخدم مانع للحمل	في الوقت المناسب	كنت أنوي أن أحمل	كنت أرغب أن أرزق بطفل	أنا وشريكي كنا متفقين على أن أصبح حامN						لم أفعل أي مما تم ذكره أعNه قبل حملي
6095153566	153357312	31	Diploma	المنطقة الشرقية	Urban	2	2	0.583333	N		y	لم نستخدم مانع للحمل	في وقت غير مناسب	لم أكن أنوي أن أحمل	لم كنت أرغب أن أرزق بطفل	لم نناقش مطلقا أن ننجب أطفاN فيما بيننا						لم أفعل أي مما تم ذكره أعNه قبل حملي	ط
6095151822	153357312	31	Bachelor	الحدود الشمالية	Urban	1	1	4	N		N	لم نستخدم مانع للحمل	في الوقت المناسب	كنت أنوي أن أحمل	كانت لدي مشاعر مختلطه بأن أرزق بطفل	أنا وشريكي كنا متفقين على أن أصبح حامN	أخذت حمض الفوليك
6095139818	153357312	31	Diploma	المنطقة الشرقية	Rural	1	1	0.75	y	9	y	لم نستخدم مانع للحمل	في وقت غير مناسب	لم أكن أنوي أن أحمل	لم كنت أرغب أن أرزق بطفل	أنا وشريكي تناقشنا على أن ننجب أطفاN ما بيننا، ولكن لم أوافق أن أصبح حامN	أخذت حمض الفوليك				بحثت عن نصائح صحية/طبية
6095134490	153357312	35	Bachelor	المنطقة الشرقية	Rural	4	4	1.33333	N		y	لم نستخدم مانع للحمل	في الوقت المناسب	نيتي بالحمل كانت متذبذبة	كنت أرغب أن أرزق بطفل	أنا وشريكي تناقشنا على أن ننجب أطفاN ما بيننا، ولكن لم أوافق أن أصبح حامN						لم أفعل أي مما تم ذكره أعNه قبل حملي
6095130526	153357312	30	Bachelor	عسير	Urban	5	4	0.75	N		y	كنا نستخدم مانع للحمل , لكن ليس في كل الممارسات الحميمية	في وقت غير مناسب	لم أكن أنوي أن أحمل	لم كنت أرغب أن أرزق بطفل	لم نناقش مطلقا أن ننجب أطفاN فيما بيننا	أخذت حمض الفوليك			أكلي أصبح صحيا أكثر
6095129825	153357312	35	Bachelor	المنطقة الشرقية	Rural	1	1	1	N		y	لم نستخدم مانع للحمل	في الوقت المناسب	كنت أنوي أن أحمل	كنت أرغب أن أرزق بطفل	أنا وشريكي كنا متفقين على أن أصبح حامN	أخذت حمض الفوليك	توقفت أو قللت من التدخين	توقف زوجي عن التدخين بوجودي او داخل المنزل	أكلي أصبح صحيا أكثر	بحثت عن نصائح صحية/طبية
6095121821	153357312
6095118404	153357312	26	Bachelor	المنطقة الشرقية	Urban	1	0	-	y	8	N	كنا نستخدم مانع للحمل , لكن ليس في كل الممارسات الحميمية	في الوقت المناسب	نيتي بالحمل كانت متذبذبة	كانت لدي مشاعر مختلطه بأن أرزق بطفل	أنا وشريكي كنا متفقين على أن أصبح حامN						لم أفعل أي مما تم ذكره أعNه قبل حملي
6095106499	153357312
6095104076	153357312	36	Post graduate	المنطقة الشرقية	Rural	4	5	6	N		N	كنا نستخدم مانع للحمل , لكن ليس في كل الممارسات الحميمية	في وقت غير مناسب	لم أكن أنوي أن أحمل	لم كنت أرغب أن أرزق بطفل	أنا وشريكي تناقشنا على أن ننجب أطفاN ما بيننا، ولكن لم أوافق أن أصبح حامN						لم أفعل أي مما تم ذكره أعNه قبل حملي
6095101612	153357312	35	Bachelor	المنطقة الشرقية	Urban	3	3	1	N		y	لم نستخدم مانع للحمل	في الوقت المناسب	كنت أنوي أن أحمل	كنت أرغب أن أرزق بطفل	أنا وشريكي كنا متفقين على أن أصبح حامN	أخذت حمض الفوليك			أكلي أصبح صحيا أكثر	بحثت عن نصائح صحية/طبية
6095084006	153357312	30	Bachelor	المنطقة الشرقية	Urban	1	1	2.5	N		N	لم نستخدم مانع للحمل	في الوقت المناسب	كنت أنوي أن أحمل	كنت أرغب أن أرزق بطفل	أنا وشريكي كنا متفقين على أن أصبح حامN	أخذت حمض الفوليك
6095079444	153357312
6095077762	153357312
6095077154	153357312	27	Diploma	المنطقة الشرقية	Rural	5	2	0.75	N		y	لم نستخدم مانع للحمل	جيد, لكنه ليس في الوقت المناسب تماما	نيتي بالحمل كانت متذبذبة	كانت لدي مشاعر مختلطه بأن أرزق بطفل	أنا وشريكي كنا متفقين على أن أصبح حامN				أكلي أصبح صحيا أكثر		لم أفعل أي مما تم ذكره أعNه قبل حملي
6095076194	153357312
6095073636	153357312	37	Bachelor	المنطقة الشرقية	Urban	4	2	3	N		N	لم نستخدم مانع للحمل	في الوقت المناسب	كنت أنوي أن أحمل	كنت أرغب أن أرزق بطفل	أنا وشريكي كنا متفقين على أن أصبح حامN				أكلي أصبح صحيا أكثر
6095069827	153357312	37	Bachelor	المنطقة الشرقية	Rural	4	3	3	N		N	لم نستخدم مانع للحمل	في الوقت المناسب	كنت أنوي أن أحمل	كنت أرغب أن أرزق بطفل	أنا وشريكي كنا متفقين على أن أصبح حامN	أخذت حمض الفوليك			أكلي أصبح صحيا أكثر	بحثت عن نصائح صحية/طبية
6095067977	153357312	28	Bachelor	المنطقة الشرقية	Rural	3	3	0.833333	N		y	كنا نستخدم مانع للحمل , لكن ليس في كل الممارسات الحميمية	جيد, لكنه ليس في الوقت المناسب تماما	لم أكن أنوي أن أحمل	كانت لدي مشاعر مختلطه بأن أرزق بطفل	أنا وشريكي تناقشنا على أن ننجب أطفاN ما بيننا، ولكن لم أوافق أن أصبح حامN						لم أفعل أي مما تم ذكره أعNه قبل حملي
6095061680	153357312	30	Secondary school	المنطقة الشرقية	Rural	6	3	2	y	8	N	لم نستخدم مانع للحمل	في وقت غير مناسب	لم أكن أنوي أن أحمل	لم كنت أرغب أن أرزق بطفل	لم نناقش مطلقا أن ننجب أطفاN فيما بيننا						لم أفعل أي مما تم ذكره أعNه قبل حملي
6095060385	153357312	29	Bachelor	المنطقة الشرقية	Urban	1	3	2.41667	N		N
6095060006	153357312
6095059897	153357312	27	Secondary school	المنطقة الشرقية	Urban	1	1	6	N		N	لم نستخدم مانع للحمل	في الوقت المناسب	نيتي بالحمل كانت متذبذبة	كانت لدي مشاعر مختلطه بأن أرزق بطفل	لم نناقش مطلقا أن ننجب أطفاN فيما بيننا						لم أفعل أي مما تم ذكره أعNه قبل حملي
6095055514	153357312	29	Bachelor	المنطقة الشرقية	Urban	3	3	2.41667	N		N
6095053934	153357312	40	Bachelor	المنطقة الشرقية	Rural	4	3	0.416667	N		N	لم نستخدم مانع للحمل	في الوقت المناسب	كنت أنوي أن أحمل	كنت أرغب أن أرزق بطفل	أنا وشريكي كنا متفقين على أن أصبح حامN	أخذت حمض الفوليك
6095052747	153357312	38	Bachelor	المنطقة الشرقية	Urban	4	4	6	N		N	(دائما نستخدم مانع للحمل , لكنني أعلم ان المانع فشل ( تشقق, تحرك من مكانه, انخلع عن مكانه, لم يعمل, إلخ	جيد, لكنه ليس في الوقت المناسب تماما	نيتي بالحمل كانت متذبذبة	كانت لدي مشاعر مختلطه بأن أرزق بطفل	أنا وشريكي تناقشنا على أن ننجب أطفاN ما بيننا، ولكن لم أوافق أن أصبح حامN						لم أفعل أي مما تم ذكره أعNه قبل حملي
6095047509	153357312	37	Bachelor	المنطقة الشرقية	Urban	4	4	6	N		N
6095046226	153357312	28	Secondary school	المنطقة الشرقية	Urban	2	2	2.5	N		N	لم نستخدم مانع للحمل	جيد, لكنه ليس في الوقت المناسب تماما	نيتي بالحمل كانت متذبذبة	كانت لدي مشاعر مختلطه بأن أرزق بطفل	أنا وشريكي كنا متفقين على أن أصبح حامN						لم أفعل أي مما تم ذكره أعNه قبل حملي
6095045802	153357312	33	Bachelor	المنطقة الشرقية	Urban	3	3	5	N		N	لم نستخدم مانع للحمل	في الوقت المناسب	كنت أنوي أن أحمل	كنت أرغب أن أرزق بطفل	أنا وشريكي كنا متفقين على أن أصبح حامN	أخذت حمض الفوليك			أكلي أصبح صحيا أكثر	بحثت عن نصائح صحية/طبية
6095042635	153357312	26	Diploma	المنطقة الشرقية	Urban	2	1	7	y	7	N	كنا نستخدم مانع للحمل , لكن ليس في كل الممارسات الحميمية	في الوقت المناسب	كنت أنوي أن أحمل	كنت أرغب أن أرزق بطفل	لم نناقش مطلقا أن ننجب أطفاN فيما بيننا					بحثت عن نصائح صحية/طبية	لم أفعل أي مما تم ذكره أعNه قبل حملي
6095040131	153357312
6095039320	153357312	37	Bachelor	المنطقة الشرقية	Rural	2	2	4.5	N		N	(دائما نستخدم مانع للحمل , لكنني أعلم ان المانع فشل ( تشقق, تحرك من مكانه, انخلع عن مكانه, لم يعمل, إلخ	جيد, لكنه ليس في الوقت المناسب تماما	لم أكن أنوي أن أحمل	لم كنت أرغب أن أرزق بطفل	أنا وشريكي تناقشنا على أن ننجب أطفاN ما بيننا، ولكن لم أوافق أن أصبح حامN			توقف زوجي عن التدخين بوجودي او داخل المنزل
6095037561	153357312	43	Bachelor	المنطقة الشرقية	Urban	5	5	9	N		N	دائما نستخدم مانع للحمل	في وقت غير مناسب	لم أكن أنوي أن أحمل	لم كنت أرغب أن أرزق بطفل	لم نناقش مطلقا أن ننجب أطفاN فيما بيننا						لم أفعل أي مما تم ذكره أعNه قبل حملي
6095037146	153357312	33	Post graduate	المنطقة الشرقية	Urban	5	4	3	N		N	كنا نستخدم مانع للحمل , لكن ليس في كل الممارسات الحميمية	جيد, لكنه ليس في الوقت المناسب تماما	نيتي بالحمل كانت متذبذبة	كانت لدي مشاعر مختلطه بأن أرزق بطفل	لم نناقش مطلقا أن ننجب أطفاN فيما بيننا						لم أفعل أي مما تم ذكره أعNه قبل حملي
6095036989	153357312	27	Diploma	المنطقة الشرقية	Urban	1	1	1	N		y	كنا نستخدم مانع للحمل , لكن ليس في كل الممارسات الحميمية	جيد, لكنه ليس في الوقت المناسب تماما	لم أكن أنوي أن أحمل	كانت لدي مشاعر مختلطه بأن أرزق بطفل	أنا وشريكي كنا متفقين على أن أصبح حامN						لم أفعل أي مما تم ذكره أعNه قبل حملي
6095035924	153357312	28	Bachelor	المنطقة الشرقية	Urban	2	1	3.5	y	7	N	لم نستخدم مانع للحمل	في الوقت المناسب	كنت أنوي أن أحمل	كنت أرغب أن أرزق بطفل	أنا وشريكي كنا متفقين على أن أصبح حامN	أخذت حمض الفوليك
6095034339	153357312	49	Secondary school	المنطقة الشرقية	Urban	10	6	5.75	N		N	(دائما نستخدم مانع للحمل , لكنني أعلم ان المانع فشل ( تشقق, تحرك من مكانه, انخلع عن مكانه, لم يعمل, إلخ	في وقت غير مناسب	نيتي بالحمل كانت متذبذبة	كانت لدي مشاعر مختلطه بأن أرزق بطفل	أنا وشريكي تناقشنا على أن ننجب أطفاN ما بيننا، ولكن لم أوافق أن أصبح حامN						لم أفعل أي مما تم ذكره أعNه قبل حملي
6095031364	153357312	30	Diploma	المنطقة الشرقية	Urban	3	2	2	y	9	N	(دائما نستخدم مانع للحمل , لكنني أعلم ان المانع فشل ( تشقق, تحرك من مكانه, انخلع عن مكانه, لم يعمل, إلخ	في وقت غير مناسب	لم أكن أنوي أن أحمل	لم كنت أرغب أن أرزق بطفل	لم نناقش مطلقا أن ننجب أطفاN فيما بيننا						لم أفعل أي مما تم ذكره أعNه قبل حملي
6095030934	153357312
6095029166	153357312
6095028436	153357312	29	Bachelor	المنطقة الشرقية	Urban	2	2	3	y	8	N	لم نستخدم مانع للحمل	جيد, لكنه ليس في الوقت المناسب تماما	نيتي بالحمل كانت متذبذبة	كانت لدي مشاعر مختلطه بأن أرزق بطفل	أنا وشريكي تناقشنا على أن ننجب أطفاN ما بيننا، ولكن لم أوافق أن أصبح حامN						لم أفعل أي مما تم ذكره أعNه قبل حملي
6095027578	153357312	43	Intermediate school	المنطقة الشرقية	Urban	8	8	4	N		N	كنا نستخدم مانع للحمل , لكن ليس في كل الممارسات الحميمية	في وقت غير مناسب	لم أكن أنوي أن أحمل	لم كنت أرغب أن أرزق بطفل	أنا وشريكي تناقشنا على أن ننجب أطفاN ما بيننا، ولكن لم أوافق أن أصبح حامN						لم أفعل أي مما تم ذكره أعNه قبل حملي
6095027233	153357312
6095026188	153357312	37	Bachelor	المنطقة الشرقية	Rural	-	-	0	N		N
6095024770	153357312	30	Post graduate	الرياض	Urban	4	4	1	N		y	لم نستخدم مانع للحمل	جيد, لكنه ليس في الوقت المناسب تماما	نيتي بالحمل كانت متذبذبة	كانت لدي مشاعر مختلطه بأن أرزق بطفل	أنا وشريكي كنا متفقين على أن أصبح حامN	أخذت حمض الفوليك
6095023561	153357312	48	Bachelor	المنطقة الشرقية	Rural	5	4	14	N		N	لم نستخدم مانع للحمل	جيد, لكنه ليس في الوقت المناسب تماما	لم أكن أنوي أن أحمل	كانت لدي مشاعر مختلطه بأن أرزق بطفل	أنا وشريكي تناقشنا على أن ننجب أطفاN ما بيننا، ولكن لم أوافق أن أصبح حامN							عادة اكلي صحي
6095022663	153357312	42	Bachelor	المنطقة الشرقية	Urban	7	5	0.115068	N		y	كنا نستخدم مانع للحمل , لكن ليس في كل الممارسات الحميمية	جيد, لكنه ليس في الوقت المناسب تماما	لم أكن أنوي أن أحمل	كانت لدي مشاعر مختلطه بأن أرزق بطفل	أنا وشريكي تناقشنا على أن ننجب أطفاN ما بيننا، ولكن لم أوافق أن أصبح حامN						لم أفعل أي مما تم ذكره أعNه قبل حملي
6095022576	153357312	34	Bachelor	المنطقة الشرقية	Rural	4	4	3	N		N	لم نستخدم مانع للحمل	في الوقت المناسب	كنت أنوي أن أحمل	كنت أرغب أن أرزق بطفل	أنا وشريكي كنا متفقين على أن أصبح حامN	أخذت حمض الفوليك
6095015494	153357312
6094743964	153357312	36	Bachelor	المنطقة الشرقية	Urban	2	2	0.75	N		y	لم نستخدم مانع للحمل	في الوقت المناسب	كنت أنوي أن أحمل	كنت أرغب أن أرزق بطفل	أنا وشريكي كنا متفقين على أن أصبح حامN						لم أفعل أي مما تم ذكره أعNه قبل حملي
6094568300	153357312	34	Bachelor	المنطقة الشرقية	Urban	1	0	-	y	4	N	لم نستخدم مانع للحمل	جيد, لكنه ليس في الوقت المناسب تماما	نيتي بالحمل كانت متذبذبة	كانت لدي مشاعر مختلطه بأن أرزق بطفل	أنا وشريكي تناقشنا على أن ننجب أطفاN ما بيننا، ولكن لم أوافق أن أصبح حامN						لم أفعل أي مما تم ذكره أعNه قبل حملي
6094547942	153357312	31	Bachelor	مكة المكرمة	Urban	1	0	-	y	7	N	لم نستخدم مانع للحمل	جيد, لكنه ليس في الوقت المناسب تماما	كنت أنوي أن أحمل	كنت أرغب أن أرزق بطفل	أنا وشريكي كنا متفقين على أن أصبح حامN	أخذت حمض الفوليك
6094517578	153357312	25	Secondary school	المنطقة الشرقية	Urban	2	2	0.833333	N		N	لم نستخدم مانع للحمل	في الوقت المناسب	كنت أنوي أن أحمل	كنت أرغب أن أرزق بطفل	أنا وشريكي كنا متفقين على أن أصبح حامN						لم أفعل أي مما تم ذكره أعNه قبل حملي
6094458615	153357312
6094434648	153357312	27	Bachelor	المنطقة الشرقية	Urban	2	1	5	y	7	N	كنا نستخدم مانع للحمل , لكن ليس في كل الممارسات الحميمية	في الوقت المناسب	نيتي بالحمل كانت متذبذبة	كانت لدي مشاعر مختلطه بأن أرزق بطفل	أنا وشريكي كنا متفقين على أن أصبح حامN							مارست الرياضه
6094311845	153357312
6094285817	153357312	34	Secondary school	المنطقة الشرقية	Urban	3	2	3	y	2	N	كنا نستخدم مانع للحمل , لكن ليس في كل الممارسات الحميمية	في وقت غير مناسب	نيتي بالحمل كانت متذبذبة	كانت لدي مشاعر مختلطه بأن أرزق بطفل	لم نناقش مطلقا أن ننجب أطفاN فيما بيننا						لم أفعل أي مما تم ذكره أعNه قبل حملي
6094279782	153357312	38	Secondary school	المنطقة الشرقية	Urban	1	1	3	N		N	كنا نستخدم مانع للحمل , لكن ليس في كل الممارسات الحميمية	في وقت غير مناسب	لم أكن أنوي أن أحمل	لم كنت أرغب أن أرزق بطفل	لم نناقش مطلقا أن ننجب أطفاN فيما بيننا						لم أفعل أي مما تم ذكره أعNه قبل حملي
6094270761	153357312
6094233660	153357312	25	Bachelor	المنطقة الشرقية	Rural	1	1	0.833333	N		N	لم نستخدم مانع للحمل	في الوقت المناسب	كنت أنوي أن أحمل	كنت أرغب أن أرزق بطفل	أنا وشريكي كنا متفقين على أن أصبح حامN	أخذت حمض الفوليك			أكلي أصبح صحيا أكثر	بحثت عن نصائح صحية/طبية
6094225934	153357312	28	Post graduate	الرياض	Urban	5	2	0.5	N		y	كنا نستخدم مانع للحمل , لكن ليس في كل الممارسات الحميمية	جيد, لكنه ليس في الوقت المناسب تماما	نيتي بالحمل كانت متذبذبة	كانت لدي مشاعر مختلطه بأن أرزق بطفل	أنا وشريكي كنا متفقين على أن أصبح حامN				أكلي أصبح صحيا أكثر	بحثت عن نصائح صحية/طبية
6094218402	153357312	28	Bachelor	المنطقة الشرقية	Rural	3	3	1.41667	N		N	كنا نستخدم مانع للحمل , لكن ليس في كل الممارسات الحميمية	جيد, لكنه ليس في الوقت المناسب تماما	لم أكن أنوي أن أحمل	لم كنت أرغب أن أرزق بطفل	أنا وشريكي تناقشنا على أن ننجب أطفاN ما بيننا، ولكن لم أوافق أن أصبح حامN						لم أفعل أي مما تم ذكره أعNه قبل حملي
6094197676	153357312	31	Bachelor	المدينة المنورة	Urban	1	1	3	N		N	كنا نستخدم مانع للحمل , لكن ليس في كل الممارسات الحميمية	في الوقت المناسب	نيتي بالحمل كانت متذبذبة	كنت أرغب أن أرزق بطفل	أنا وشريكي تناقشنا على أن ننجب أطفاN ما بيننا، ولكن لم أوافق أن أصبح حامN						لم أفعل أي مما تم ذكره أعNه قبل حملي
6094178889	153357312	30	Bachelor	المنطقة الشرقية	Urban	3	3	0.416667	N		y	كنا نستخدم مانع للحمل , لكن ليس في كل الممارسات الحميمية	جيد, لكنه ليس في الوقت المناسب تماما	لم أكن أنوي أن أحمل	لم كنت أرغب أن أرزق بطفل	أنا وشريكي تناقشنا على أن ننجب أطفاN ما بيننا، ولكن لم أوافق أن أصبح حامN							لم يكن مخطط للحمل ولكن اNكل كان صحي وNيود من يدخن بالمنزل
6094174641	153357312	25	Diploma	المنطقة الشرقية	Urban	6	6	25	N		y	لم نستخدم مانع للحمل	في الوقت المناسب	لم أكن أنوي أن أحمل	لم كنت أرغب أن أرزق بطفل	لم نناقش مطلقا أن ننجب أطفاN فيما بيننا						لم أفعل أي مما تم ذكره أعNه قبل حملي
6094174081	153357312	32	Secondary school	المنطقة الشرقية	Urban	3	2	4	y	8	N	لم نستخدم مانع للحمل	في الوقت المناسب	كنت أنوي أن أحمل	كنت أرغب أن أرزق بطفل	أنا وشريكي كنا متفقين على أن أصبح حامN				أكلي أصبح صحيا أكثر
6094173458	153357312
6094163996	153357312	25	Bachelor	المنطقة الشرقية	Rural	1	1	1.58333	N		y	لم نستخدم مانع للحمل	في الوقت المناسب	كنت أنوي أن أحمل	كنت أرغب أن أرزق بطفل	لم نناقش مطلقا أن ننجب أطفاN فيما بيننا						لم أفعل أي مما تم ذكره أعNه قبل حملي
6094163762	153357312	26	Secondary school	المنطقة الشرقية	Urban	4	0	-	N		N	لم نستخدم مانع للحمل	في الوقت المناسب	كنت أنوي أن أحمل	كانت لدي مشاعر مختلطه بأن أرزق بطفل	أنا وشريكي كنا متفقين على أن أصبح حامN	أخذت حمض الفوليك
6094162356	153357312	29	Bachelor	المنطقة الشرقية	Rural	3	3	2	N		N	دائما نستخدم مانع للحمل	في وقت غير مناسب	نيتي بالحمل كانت متذبذبة	كانت لدي مشاعر مختلطه بأن أرزق بطفل	أنا وشريكي تناقشنا على أن ننجب أطفاN ما بيننا، ولكن لم أوافق أن أصبح حامN						لم أفعل أي مما تم ذكره أعNه قبل حملي
6094149081	153357312	47	Post graduate	المنطقة الشرقية	Urban	2	1	15	N		N	لم نستخدم مانع للحمل	في الوقت المناسب	كنت أنوي أن أحمل	كنت أرغب أن أرزق بطفل	أنا وشريكي كنا متفقين على أن أصبح حامN	أخذت حمض الفوليك				بحثت عن نصائح صحية/طبية
6094137986	153357312
6094136611	153357312	28	Bachelor	المنطقة الشرقية	Urban	3	3	0.75	N		y
6094123216	153357312
6094122421	153357312	30	Bachelor	المنطقة الشرقية	Urban	2	2	0.583333	N		y	لم نستخدم مانع للحمل	في الوقت المناسب	كنت أنوي أن أحمل	كنت أرغب أن أرزق بطفل	أنا وشريكي كنا متفقين على أن أصبح حامN	أخذت حمض الفوليك						عملت فحوصات للتأكد ان كل اNمور طبيعيه وممكن الحمل
6094117983	153357312	24	Bachelor	المنطقة الشرقية	Rural	1	1	2	N		N	لم نستخدم مانع للحمل	في الوقت المناسب	كنت أنوي أن أحمل	كنت أرغب أن أرزق بطفل	أنا وشريكي كنا متفقين على أن أصبح حامN	أخذت حمض الفوليك				بحثت عن نصائح صحية/طبية
6094115801	153357312	39	Secondary school	المنطقة الشرقية	Urban	4	4	8.58333	N		N
6094111739	153357312
6094109182	153357312	37	Bachelor	المنطقة الشرقية	Urban	2	3	0.5	N		y	كنا نستخدم مانع للحمل , لكن ليس في كل الممارسات الحميمية	جيد, لكنه ليس في الوقت المناسب تماما	نيتي بالحمل كانت متذبذبة	كانت لدي مشاعر مختلطه بأن أرزق بطفل	لم نناقش مطلقا أن ننجب أطفاN فيما بيننا	أخذت حمض الفوليك				بحثت عن نصائح صحية/طبية
6094106985	153357312	31	Post graduate	المنطقة الشرقية	Urban	1	1	1	N		N	لم نستخدم مانع للحمل	في الوقت المناسب	كنت أنوي أن أحمل	كنت أرغب أن أرزق بطفل	أنا وشريكي كنا متفقين على أن أصبح حامN	أخذت حمض الفوليك		توقف زوجي عن التدخين بوجودي او داخل المنزل	أكلي أصبح صحيا أكثر	بحثت عن نصائح صحية/طبية
6094106584	153357312	40	Bachelor	المنطقة الشرقية	Urban	2	2	11	N		N	لم نستخدم مانع للحمل	في الوقت المناسب	كنت أنوي أن أحمل	كانت لدي مشاعر مختلطه بأن أرزق بطفل	أنا وشريكي كنا متفقين على أن أصبح حامN					بحثت عن نصائح صحية/طبية
6094100086	153357312	44	Bachelor	المنطقة الشرقية	Urban	6	6	2.58333	N		N	كنا نستخدم مانع للحمل , لكن ليس في كل الممارسات الحميمية	جيد, لكنه ليس في الوقت المناسب تماما	نيتي بالحمل كانت متذبذبة	كانت لدي مشاعر مختلطه بأن أرزق بطفل	أنا وشريكي تناقشنا على أن ننجب أطفاN ما بيننا، ولكن لم أوافق أن أصبح حامN						لم أفعل أي مما تم ذكره أعNه قبل حملي
6094097702	153357312
6094092813	153357312	29	Bachelor	المنطقة الشرقية	Urban	2	3	2	N		N	لم نستخدم مانع للحمل	في الوقت المناسب	كنت أنوي أن أحمل	كنت أرغب أن أرزق بطفل	لم نناقش مطلقا أن ننجب أطفاN فيما بيننا	أخذت حمض الفوليك						منشط حمل..كلوميد
6094090769	153357312	26	Diploma	المنطقة الشرقية	Urban	2	2	2	N		N	لم نستخدم مانع للحمل	جيد, لكنه ليس في الوقت المناسب تماما	نيتي بالحمل كانت متذبذبة	كانت لدي مشاعر مختلطه بأن أرزق بطفل	أنا وشريكي تناقشنا على أن ننجب أطفاN ما بيننا، ولكن لم أوافق أن أصبح حامN						لم أفعل أي مما تم ذكره أعNه قبل حملي
6094083871	153357312	24	Secondary school	المنطقة الشرقية	Urban	2	2	0.75	N		y	لم نستخدم مانع للحمل	في الوقت المناسب	كنت أنوي أن أحمل	كنت أرغب أن أرزق بطفل	أنا وشريكي كنا متفقين على أن أصبح حامN						لم أفعل أي مما تم ذكره أعNه قبل حملي
6094076218	153357312
6094075996	153357312	25	Bachelor	المنطقة الشرقية	Urban	1	1	1.58333	N		y	لم نستخدم مانع للحمل	في الوقت المناسب	كنت أنوي أن أحمل	كنت أرغب أن أرزق بطفل	أنا وشريكي كنا متفقين على أن أصبح حامN						لم أفعل أي مما تم ذكره أعNه قبل حملي
6094075659	153357312	23	Diploma	المنطقة الشرقية	Urban	2	2	2	N		N	لم نستخدم مانع للحمل	في الوقت المناسب	نيتي بالحمل كانت متذبذبة	كانت لدي مشاعر مختلطه بأن أرزق بطفل	لم نناقش مطلقا أن ننجب أطفاN فيما بيننا						لم أفعل أي مما تم ذكره أعNه قبل حملي
6094074594	153357312	20	Bachelor	المنطقة الشرقية	Urban	1	1	0.583333	N		y	كنا نستخدم مانع للحمل , لكن ليس في كل الممارسات الحميمية	جيد, لكنه ليس في الوقت المناسب تماما	لم أكن أنوي أن أحمل	كانت لدي مشاعر مختلطه بأن أرزق بطفل	أنا وشريكي تناقشنا على أن ننجب أطفاN ما بيننا، ولكن لم أوافق أن أصبح حامN						لم أفعل أي مما تم ذكره أعNه قبل حملي
6094070473	153357312	25	Secondary school	المنطقة الشرقية	Urban	3	1	1.66667	y	7	N	(دائما نستخدم مانع للحمل , لكنني أعلم ان المانع فشل ( تشقق, تحرك من مكانه, انخلع عن مكانه, لم يعمل, إلخ	في وقت غير مناسب	لم أكن أنوي أن أحمل	لم كنت أرغب أن أرزق بطفل	أنا وشريكي تناقشنا على أن ننجب أطفاN ما بيننا، ولكن لم أوافق أن أصبح حامN						لم أفعل أي مما تم ذكره أعNه قبل حملي
6094069880	153357312	40	Secondary school	المنطقة الشرقية	Urban	5	3	14	N		N	لم نستخدم مانع للحمل	في وقت غير مناسب	لم أكن أنوي أن أحمل	كانت لدي مشاعر مختلطه بأن أرزق بطفل	لم نناقش مطلقا أن ننجب أطفاN فيما بيننا						لم أفعل أي مما تم ذكره أعNه قبل حملي
6094066461	153357312	27	Diploma	المنطقة الشرقية	Urban	3	0	6	y	3	N	لم نستخدم مانع للحمل	في الوقت المناسب	كنت أنوي أن أحمل	كنت أرغب أن أرزق بطفل	أنا وشريكي كنا متفقين على أن أصبح حامN	أخذت حمض الفوليك				بحثت عن نصائح صحية/طبية
6094065972	153357312	35	Post graduate	المنطقة الشرقية	Urban	3	3	2	N		N	لم نستخدم مانع للحمل	في الوقت المناسب	كنت أنوي أن أحمل	كنت أرغب أن أرزق بطفل	أنا وشريكي كنا متفقين على أن أصبح حامN				أكلي أصبح صحيا أكثر	بحثت عن نصائح صحية/طبية
6094061210	153357312	30	Secondary school	المنطقة الشرقية	Rural	3	1	3	y	2	N	لم نستخدم مانع للحمل	في الوقت المناسب	كنت أنوي أن أحمل	كنت أرغب أن أرزق بطفل	أنا وشريكي كنا متفقين على أن أصبح حامN				أكلي أصبح صحيا أكثر
6094059591	153357312	29	Bachelor	المنطقة الشرقية	Rural	2	2	0.75	N		y	لم نستخدم مانع للحمل	في الوقت المناسب	كنت أنوي أن أحمل	كنت أرغب أن أرزق بطفل	أنا وشريكي كنا متفقين على أن أصبح حامN	أخذت حمض الفوليك			أكلي أصبح صحيا أكثر	بحثت عن نصائح صحية/طبية
6094057033	153357312
6094052430	153357312	23	Bachelor	المنطقة الشرقية	Urban	1	1	1.75	N		y	لم نستخدم مانع للحمل	جيد, لكنه ليس في الوقت المناسب تماما	نيتي بالحمل كانت متذبذبة	كانت لدي مشاعر مختلطه بأن أرزق بطفل	لم نناقش مطلقا أن ننجب أطفاN فيما بيننا						لم أفعل أي مما تم ذكره أعNه قبل حملي
6094052047	153357312	30	Post graduate	القصيم	Urban	4	4	0.0833333	N		y	لم نستخدم مانع للحمل	في الوقت المناسب	كنت أنوي أن أحمل	كنت أرغب أن أرزق بطفل	أنا وشريكي كنا متفقين على أن أصبح حامN						لم أفعل أي مما تم ذكره أعNه قبل حملي
6094050564	153357312
6094049139	153357312	29	Bachelor	المنطقة الشرقية	Rural	3	2	1	N		y	كنا نستخدم مانع للحمل , لكن ليس في كل الممارسات الحميمية	في الوقت المناسب	كنت أنوي أن أحمل	كنت أرغب أن أرزق بطفل	أنا وشريكي كنا متفقين على أن أصبح حامN	أخذت حمض الفوليك
6094047433	153357312
6094043318	153357312
6094032941	153357312
6094029097	153357312	26	Bachelor	المنطقة الشرقية	Urban	2	0	-	y	9	N	لم نستخدم مانع للحمل	في الوقت المناسب	نيتي بالحمل كانت متذبذبة	كنت أرغب أن أرزق بطفل	أنا وشريكي كنا متفقين على أن أصبح حامN	أخذت حمض الفوليك
6094021431	153357312	28	Bachelor	المنطقة الشرقية	Urban	2	2	4	N		N	(دائما نستخدم مانع للحمل , لكنني أعلم ان المانع فشل ( تشقق, تحرك من مكانه, انخلع عن مكانه, لم يعمل, إلخ	جيد, لكنه ليس في الوقت المناسب تماما	نيتي بالحمل كانت متذبذبة	كانت لدي مشاعر مختلطه بأن أرزق بطفل	أنا وشريكي تناقشنا على أن ننجب أطفاN ما بيننا، ولكن لم أوافق أن أصبح حامN						لم أفعل أي مما تم ذكره أعNه قبل حملي
6094020904	153357312	41	Diploma	المنطقة الشرقية	Urban	5	3	11	N		N	لم نستخدم مانع للحمل	في الوقت المناسب	كنت أنوي أن أحمل	كنت أرغب أن أرزق بطفل	أنا وشريكي كنا متفقين على أن أصبح حامN	أخذت حمض الفوليك				بحثت عن نصائح صحية/طبية
6094020658	153357312
6094020283	153357312	32	Bachelor	المنطقة الشرقية	Urban	1	1	5	N		N	لم نستخدم مانع للحمل	جيد, لكنه ليس في الوقت المناسب تماما	نيتي بالحمل كانت متذبذبة	كنت أرغب أن أرزق بطفل	لم نناقش مطلقا أن ننجب أطفاN فيما بيننا						لم أفعل أي مما تم ذكره أعNه قبل حملي
6094019953	153357312	40	Post graduate	المنطقة الشرقية	Rural	1	1	14	N		N	لم نستخدم مانع للحمل	في الوقت المناسب	كنت أنوي أن أحمل	كنت أرغب أن أرزق بطفل	أنا وشريكي كنا متفقين على أن أصبح حامN	أخذت حمض الفوليك			أكلي أصبح صحيا أكثر
6094018877	153357312	32	Bachelor	المنطقة الشرقية	Urban	3	2	5	y	7	N	لم نستخدم مانع للحمل	في الوقت المناسب	كنت أنوي أن أحمل	كنت أرغب أن أرزق بطفل	أنا وشريكي كنا متفقين على أن أصبح حامN	أخذت حمض الفوليك			أكلي أصبح صحيا أكثر
6094016951	153357312
6094015875	153357312	20	Secondary school	المنطقة الشرقية	Rural	1	1	2	N		y	لم نستخدم مانع للحمل	جيد, لكنه ليس في الوقت المناسب تماما	لم أكن أنوي أن أحمل	كانت لدي مشاعر مختلطه بأن أرزق بطفل	أنا وشريكي تناقشنا على أن ننجب أطفاN ما بيننا، ولكن لم أوافق أن أصبح حامN					بحثت عن نصائح صحية/طبية
6094014439	153357312
6094011967	153357312
6094010273	153357312	33	Bachelor	المنطقة الشرقية	Urban	2	2	5	N		N	كنا نستخدم مانع للحمل , لكن ليس في كل الممارسات الحميمية	في الوقت المناسب	لم أكن أنوي أن أحمل	كانت لدي مشاعر مختلطه بأن أرزق بطفل	لم نناقش مطلقا أن ننجب أطفاN فيما بيننا						لم أفعل أي مما تم ذكره أعNه قبل حملي
6094008975	153357312
6094006981	153357312
6094005984	153357312	33	Diploma	المنطقة الشرقية	Urban	2	1	2.41667	N		N
6094005402	153357312	30	Bachelor	المنطقة الشرقية	Urban	2	3	0.666667	N		y	كنا نستخدم مانع للحمل , لكن ليس في كل الممارسات الحميمية	في الوقت المناسب	نيتي بالحمل كانت متذبذبة	كانت لدي مشاعر مختلطه بأن أرزق بطفل	أنا وشريكي تناقشنا على أن ننجب أطفاN ما بيننا، ولكن لم أوافق أن أصبح حامN						لم أفعل أي مما تم ذكره أعNه قبل حملي
6094005279	153357312
6094005059	153357312	38	Secondary school	المنطقة الشرقية	Urban	7	5	7	N		N	لم نستخدم مانع للحمل	في الوقت المناسب	كنت أنوي أن أحمل	كنت أرغب أن أرزق بطفل	أنا وشريكي كنا متفقين على أن أصبح حامN						لم أفعل أي مما تم ذكره أعNه قبل حملي
6094002458	153357312
6094002338	153357312
6094001254	153357312
6093999992	153357312
6093999631	153357312	40	Bachelor	القصيم	Urban	5	4	1	N		y	لم نستخدم مانع للحمل	في الوقت المناسب	كنت أنوي أن أحمل	كنت أرغب أن أرزق بطفل	أنا وشريكي كنا متفقين على أن أصبح حامN	أخذت حمض الفوليك				بحثت عن نصائح صحية/طبية
6093997028	153357312	42	Diploma	المنطقة الشرقية	Urban	5	5	10	N		N	كنا نستخدم مانع للحمل , لكن ليس في كل الممارسات الحميمية	جيد, لكنه ليس في الوقت المناسب تماما	لم أكن أنوي أن أحمل	لم كنت أرغب أن أرزق بطفل	لم نناقش مطلقا أن ننجب أطفاN فيما بيننا						لم أفعل أي مما تم ذكره أعNه قبل حملي
6093996480	153357312	35	Secondary school	المنطقة الشرقية	Rural	8	5	2	y	4	N	دائما نستخدم مانع للحمل	في وقت غير مناسب	لم أكن أنوي أن أحمل	لم كنت أرغب أن أرزق بطفل	لم نناقش مطلقا أن ننجب أطفاN فيما بيننا				أكلي أصبح صحيا أكثر			ممارسة الرياضة بانتظام
6093996416	153357312	46	Secondary school	المنطقة الشرقية	Urban	5	5	8	N		N	(دائما نستخدم مانع للحمل , لكنني أعلم ان المانع فشل ( تشقق, تحرك من مكانه, انخلع عن مكانه, لم يعمل, إلخ	جيد, لكنه ليس في الوقت المناسب تماما	لم أكن أنوي أن أحمل	كانت لدي مشاعر مختلطه بأن أرزق بطفل	أنا وشريكي تناقشنا على أن ننجب أطفاN ما بيننا، ولكن لم أوافق أن أصبح حامN	أخذت حمض الفوليك
6093996325	153357312	47	Diploma	المنطقة الشرقية	Urban	5	5	10	N		N	كنا نستخدم مانع للحمل , لكن ليس في كل الممارسات الحميمية	جيد, لكنه ليس في الوقت المناسب تماما	لم أكن أنوي أن أحمل	كانت لدي مشاعر مختلطه بأن أرزق بطفل	لم نناقش مطلقا أن ننجب أطفاN فيما بيننا	أخذت حمض الفوليك			أكلي أصبح صحيا أكثر	بحثت عن نصائح صحية/طبية
6093996011	153357312							10
6093994604	153357312	38	Bachelor	المنطقة الشرقية	Rural	4	4	3	N		N	(دائما نستخدم مانع للحمل , لكنني أعلم ان المانع فشل ( تشقق, تحرك من مكانه, انخلع عن مكانه, لم يعمل, إلخ	في وقت غير مناسب	لم أكن أنوي أن أحمل	كانت لدي مشاعر مختلطه بأن أرزق بطفل	لم نناقش مطلقا أن ننجب أطفاN فيما بيننا						لم أفعل أي مما تم ذكره أعNه قبل حملي
6093992609	153357312
6093992538	153357312
6093992371	153357312	49	Secondary school	المنطقة الشرقية	Urban	5	3	10	N		N	دائما نستخدم مانع للحمل	في الوقت المناسب	كنت أنوي أن أحمل	كنت أرغب أن أرزق بطفل	أنا وشريكي كنا متفقين على أن أصبح حامN						لم أفعل أي مما تم ذكره أعNه قبل حملي
6093992225	153357312	27	Bachelor	المنطقة الشرقية	Urban	2	2	1.5	N		N	كنا نستخدم مانع للحمل , لكن ليس في كل الممارسات الحميمية	جيد, لكنه ليس في الوقت المناسب تماما	لم أكن أنوي أن أحمل	لم كنت أرغب أن أرزق بطفل	لم نناقش مطلقا أن ننجب أطفاN فيما بيننا						لم أفعل أي مما تم ذكره أعNه قبل حملي
6093992119	153357312	42	Primary school	المنطقة الشرقية	Rural	9	3	6	N		N	لم نستخدم مانع للحمل	في الوقت المناسب	كنت أنوي أن أحمل	كنت أرغب أن أرزق بطفل	أنا وشريكي كنا متفقين على أن أصبح حامN	أخذت حمض الفوليك			أكلي أصبح صحيا أكثر
6093991449	153357312	30	Diploma	المنطقة الشرقية	Urban	1	1	10	N		N	دائما نستخدم مانع للحمل	في الوقت المناسب	كنت أنوي أن أحمل	كنت أرغب أن أرزق بطفل	أنا وشريكي كنا متفقين على أن أصبح حامN	أخذت حمض الفوليك	توقفت أو قللت من التدخين	توقف زوجي عن التدخين بوجودي او داخل المنزل	أكلي أصبح صحيا أكثر	بحثت عن نصائح صحية/طبية
6093991211	153357312	36	Diploma	المنطقة الشرقية	Rural	5	4	0.666667	N		y	لم نستخدم مانع للحمل	جيد, لكنه ليس في الوقت المناسب تماما	لم أكن أنوي أن أحمل	كانت لدي مشاعر مختلطه بأن أرزق بطفل	أنا وشريكي تناقشنا على أن ننجب أطفاN ما بيننا، ولكن لم أوافق أن أصبح حامN	أخذت حمض الفوليك			أكلي أصبح صحيا أكثر	بحثت عن نصائح صحية/طبية
6093989761	153357312
6093989400	153357312	31	Bachelor	المنطقة الشرقية	Urban	6	6	2	N		y	دائما نستخدم مانع للحمل	في وقت غير مناسب	لم أكن أنوي أن أحمل	لم كنت أرغب أن أرزق بطفل	أنا وشريكي تناقشنا على أن ننجب أطفاN ما بيننا، ولكن لم أوافق أن أصبح حامN						لم أفعل أي مما تم ذكره أعNه قبل حملي
6093988059	153357312
6093987393	153357312
6093987138	153357312	26	Diploma	المنطقة الشرقية	Rural	2	2	2	N		N	كنا نستخدم مانع للحمل , لكن ليس في كل الممارسات الحميمية	جيد, لكنه ليس في الوقت المناسب تماما	لم أكن أنوي أن أحمل	لم كنت أرغب أن أرزق بطفل	أنا وشريكي تناقشنا على أن ننجب أطفاN ما بيننا، ولكن لم أوافق أن أصبح حامN					بحثت عن نصائح صحية/طبية
6093986616	153357312	35	Bachelor	المنطقة الشرقية	Urban	2	1	10	N		y	لم نستخدم مانع للحمل	في الوقت المناسب	كنت أنوي أن أحمل	كانت لدي مشاعر مختلطه بأن أرزق بطفل	أنا وشريكي كنا متفقين على أن أصبح حامN					بحثت عن نصائح صحية/طبية
6093986454	153357312	38	Bachelor	المنطقة الشرقية	Urban	2	2	13	N		N	لم نستخدم مانع للحمل	في الوقت المناسب	كنت أنوي أن أحمل	كنت أرغب أن أرزق بطفل	أنا وشريكي كنا متفقين على أن أصبح حامN						لم أفعل أي مما تم ذكره أعNه قبل حملي
6093986223	153357312	39	Secondary school	المنطقة الشرقية	Urban	7	6	0.333333	N		y
6093982924	153357312	37	Secondary school	المنطقة الشرقية	Rural	6	6	3	N		N	(دائما نستخدم مانع للحمل , لكنني أعلم ان المانع فشل ( تشقق, تحرك من مكانه, انخلع عن مكانه, لم يعمل, إلخ	جيد, لكنه ليس في الوقت المناسب تماما	لم أكن أنوي أن أحمل	لم كنت أرغب أن أرزق بطفل	أنا وشريكي تناقشنا على أن ننجب أطفاN ما بيننا، ولكن لم أوافق أن أصبح حامN						لم أفعل أي مما تم ذكره أعNه قبل حملي
6093982556	153357312	31	Diploma	المنطقة الشرقية	Urban	1	1	8	N		N	لم نستخدم مانع للحمل	في الوقت المناسب	كنت أنوي أن أحمل	كانت لدي مشاعر مختلطه بأن أرزق بطفل	لم نناقش مطلقا أن ننجب أطفاN فيما بيننا						لم أفعل أي مما تم ذكره أعNه قبل حملي
6093982230	153357312
6093981913	153357312	30	Bachelor	المنطقة الشرقية	Rural	3	3	0.666667	N		N	لم نستخدم مانع للحمل	في الوقت المناسب	كنت أنوي أن أحمل	كنت أرغب أن أرزق بطفل	أنا وشريكي كنا متفقين على أن أصبح حامN	أخذت حمض الفوليك				بحثت عن نصائح صحية/طبية
6093979326	153357312
6093978575	153357312	49	Intermediate school	المنطقة الشرقية	Rural	9	8	11	N		N
6093977506	153357312	39	Bachelor	المنطقة الشرقية	Urban	1	1	14	N		N	لم نستخدم مانع للحمل	في الوقت المناسب	كنت أنوي أن أحمل	كنت أرغب أن أرزق بطفل	أنا وشريكي كنا متفقين على أن أصبح حامN						لم أفعل أي مما تم ذكره أعNه قبل حملي
6093976948	153357312	34	Secondary school	المنطقة الشرقية	Rural	4	4	0.166667	N		y	لم نستخدم مانع للحمل	في الوقت المناسب	كنت أنوي أن أحمل	كنت أرغب أن أرزق بطفل	أنا وشريكي كنا متفقين على أن أصبح حامN	أخذت حمض الفوليك
6093976819	153357312	41	Diploma	المنطقة الشرقية	Rural	3	3	7	N		N	لم نستخدم مانع للحمل	في الوقت المناسب	كنت أنوي أن أحمل	كنت أرغب أن أرزق بطفل	أنا وشريكي كنا متفقين على أن أصبح حامN						لم أفعل أي مما تم ذكره أعNه قبل حملي
6093976082	153357312	26	Secondary school	المنطقة الشرقية	Rural	5	4	1.25	N		N	لم نستخدم مانع للحمل	جيد, لكنه ليس في الوقت المناسب تماما	نيتي بالحمل كانت متذبذبة	كنت أرغب أن أرزق بطفل	لم نناقش مطلقا أن ننجب أطفاN فيما بيننا						لم أفعل أي مما تم ذكره أعNه قبل حملي
6093975779	153357312	22	Secondary school	المنطقة الشرقية	Rural	1	1	1.16667	N		y	لم نستخدم مانع للحمل	في الوقت المناسب	كنت أنوي أن أحمل	كنت أرغب أن أرزق بطفل	أنا وشريكي كنا متفقين على أن أصبح حامN						لم أفعل أي مما تم ذكره أعNه قبل حملي
6093975031	153357312	35	Bachelor	المنطقة الشرقية	Urban	4	4	0.416667	N		y	لم نستخدم مانع للحمل	في الوقت المناسب	كنت أنوي أن أحمل	كنت أرغب أن أرزق بطفل	أنا وشريكي كنا متفقين على أن أصبح حامN						لم أفعل أي مما تم ذكره أعNه قبل حملي
6093974948	153357312	32	Diploma	المنطقة الشرقية	Urban	3	2	5	N		N	كنا نستخدم مانع للحمل , لكن ليس في كل الممارسات الحميمية	في وقت غير مناسب	لم أكن أنوي أن أحمل	لم كنت أرغب أن أرزق بطفل	لم نناقش مطلقا أن ننجب أطفاN فيما بيننا						لم أفعل أي مما تم ذكره أعNه قبل حملي
6093974063	153357312	25	Bachelor	المنطقة الشرقية	Urban	2	1	2.66667	y	8	N	كنا نستخدم مانع للحمل , لكن ليس في كل الممارسات الحميمية	جيد, لكنه ليس في الوقت المناسب تماما	نيتي بالحمل كانت متذبذبة	كنت أرغب أن أرزق بطفل	لم نناقش مطلقا أن ننجب أطفاN فيما بيننا	أخذت حمض الفوليك
6093972605	153357312	38	Bachelor	المنطقة الشرقية	Rural	5	4	0.25	N		y	لم نستخدم مانع للحمل	جيد, لكنه ليس في الوقت المناسب تماما	نيتي بالحمل كانت متذبذبة	كنت أرغب أن أرزق بطفل	أنا وشريكي كنا متفقين على أن أصبح حامN				أكلي أصبح صحيا أكثر
6093972280	153357312	33	Secondary school	المنطقة الشرقية	Rural	6	5	2	N		N	كنا نستخدم مانع للحمل , لكن ليس في كل الممارسات الحميمية	في وقت غير مناسب	لم أكن أنوي أن أحمل	كانت لدي مشاعر مختلطه بأن أرزق بطفل	أنا وشريكي تناقشنا على أن ننجب أطفاN ما بيننا، ولكن لم أوافق أن أصبح حامN						لم أفعل أي مما تم ذكره أعNه قبل حملي
6093766207	153357312	30	Bachelor	المنطقة الشرقية	Rural	4	4	3	N		N	دائما نستخدم مانع للحمل	في وقت غير مناسب	لم أكن أنوي أن أحمل	لم كنت أرغب أن أرزق بطفل	لم نناقش مطلقا أن ننجب أطفاN فيما بيننا						لم أفعل أي مما تم ذكره أعNه قبل حملي
6093687147	153357312	41	Diploma	المنطقة الشرقية	Urban	2	2	11	N		N	كنا نستخدم مانع للحمل , لكن ليس في كل الممارسات الحميمية	جيد, لكنه ليس في الوقت المناسب تماما	نيتي بالحمل كانت متذبذبة	كانت لدي مشاعر مختلطه بأن أرزق بطفل	لم نناقش مطلقا أن ننجب أطفاN فيما بيننا						لم أفعل أي مما تم ذكره أعNه قبل حملي
6093685681	153357312	39	Diploma	المنطقة الشرقية	Urban	5	4	2.66667	y	7	N	لم نستخدم مانع للحمل	جيد, لكنه ليس في الوقت المناسب تماما	كنت أنوي أن أحمل	كنت أرغب أن أرزق بطفل	لم نناقش مطلقا أن ننجب أطفاN فيما بيننا				أكلي أصبح صحيا أكثر	بحثت عن نصائح صحية/طبية
6093677844	153357312	49	Primary school	المنطقة الشرقية	Urban	15	11	16	N		N	دائما نستخدم مانع للحمل	في وقت غير مناسب	لم أكن أنوي أن أحمل	لم كنت أرغب أن أرزق بطفل	لم نناقش مطلقا أن ننجب أطفاN فيما بيننا	أخذت حمض الفوليك			أكلي أصبح صحيا أكثر	بحثت عن نصائح صحية/طبية
6093677065	153357312	32	Bachelor	المنطقة الشرقية	Rural	1	1	3	N		N	لم نستخدم مانع للحمل	في الوقت المناسب	كنت أنوي أن أحمل	كنت أرغب أن أرزق بطفل	أنا وشريكي كنا متفقين على أن أصبح حامN	أخذت حمض الفوليك				بحثت عن نصائح صحية/طبية
6093647651	153357312
6093641998	153357312	23	Diploma	المنطقة الشرقية	Urban	1	1	1.5	N		N	لم نستخدم مانع للحمل	في الوقت المناسب	كنت أنوي أن أحمل	كنت أرغب أن أرزق بطفل	أنا وشريكي كنا متفقين على أن أصبح حامN					بحثت عن نصائح صحية/طبية
6093638933	153357312	27	Secondary school	المنطقة الشرقية	Rural	1	1	2.33333	N		N
6093634068	153357312	37	Secondary school	المنطقة الشرقية	Urban	6	2	6	N		N	(دائما نستخدم مانع للحمل , لكنني أعلم ان المانع فشل ( تشقق, تحرك من مكانه, انخلع عن مكانه, لم يعمل, إلخ	في الوقت المناسب	لم أكن أنوي أن أحمل	كانت لدي مشاعر مختلطه بأن أرزق بطفل	لم نناقش مطلقا أن ننجب أطفاN فيما بيننا				أكلي أصبح صحيا أكثر			مارست الرياضه
6093633098	153357312
6093627742	153357312	26	Diploma	المنطقة الشرقية	Urban	3	1	5	y	5	N
6093627379	153357312	33	Diploma	المنطقة الشرقية	Urban	2	2	3.25	N		N	لم نستخدم مانع للحمل	في الوقت المناسب	كنت أنوي أن أحمل	كنت أرغب أن أرزق بطفل	لم نناقش مطلقا أن ننجب أطفاN فيما بيننا						لم أفعل أي مما تم ذكره أعNه قبل حملي
6093621168	153357312	30	Bachelor	المنطقة الشرقية	Urban	2	2	2	N		N	كنا نستخدم مانع للحمل , لكن ليس في كل الممارسات الحميمية	جيد, لكنه ليس في الوقت المناسب تماما	لم أكن أنوي أن أحمل	كانت لدي مشاعر مختلطه بأن أرزق بطفل	أنا وشريكي تناقشنا على أن ننجب أطفاN ما بيننا، ولكن لم أوافق أن أصبح حامN						لم أفعل أي مما تم ذكره أعNه قبل حملي
6093603849	153357312	41	Bachelor	المنطقة الشرقية	Urban	3	2	8	N		N	كنا نستخدم مانع للحمل , لكن ليس في كل الممارسات الحميمية	في الوقت المناسب	نيتي بالحمل كانت متذبذبة	كنت أرغب أن أرزق بطفل	أنا وشريكي تناقشنا على أن ننجب أطفاN ما بيننا، ولكن لم أوافق أن أصبح حامN						لم أفعل أي مما تم ذكره أعNه قبل حملي
6093602599	153357312	37	Diploma	المنطقة الشرقية	Rural	2	2	0.416667	N		y	كنا نستخدم مانع للحمل , لكن ليس في كل الممارسات الحميمية	في الوقت المناسب	كنت أنوي أن أحمل	كنت أرغب أن أرزق بطفل	أنا وشريكي تناقشنا على أن ننجب أطفاN ما بيننا، ولكن لم أوافق أن أصبح حامN						لم أفعل أي مما تم ذكره أعNه قبل حملي
6093593198	153357312	49	Secondary school	المنطقة الشرقية	Urban	11	7	15	N		N	لم نستخدم مانع للحمل	جيد, لكنه ليس في الوقت المناسب تماما	لم أكن أنوي أن أحمل	كانت لدي مشاعر مختلطه بأن أرزق بطفل	أنا وشريكي تناقشنا على أن ننجب أطفاN ما بيننا، ولكن لم أوافق أن أصبح حامN							انا دائما احرص على اNكل الصحي قدر اNمكان
6093588900	153357312	30	Bachelor	المنطقة الشرقية	Urban	3	3	0.666667	N		y	لم نستخدم مانع للحمل	في الوقت المناسب	نيتي بالحمل كانت متذبذبة	كانت لدي مشاعر مختلطه بأن أرزق بطفل	لم نناقش مطلقا أن ننجب أطفاN فيما بيننا						لم أفعل أي مما تم ذكره أعNه قبل حملي
6093569636	153357312	34	Bachelor	المنطقة الشرقية	Urban	4	2	7	N		N	كنا نستخدم مانع للحمل , لكن ليس في كل الممارسات الحميمية	في الوقت المناسب	كنت أنوي أن أحمل	كنت أرغب أن أرزق بطفل	أنا وشريكي كنا متفقين على أن أصبح حامN						لم أفعل أي مما تم ذكره أعNه قبل حملي	خسرت الحمل اNخير بعد شهرين لعدم معرفتي بالحمل
6093561611	153357312	30	Bachelor	المنطقة الشرقية	Rural	2	2	3.5	N		N	لم نستخدم مانع للحمل	في الوقت المناسب	كنت أنوي أن أحمل	كنت أرغب أن أرزق بطفل	أنا وشريكي كنا متفقين على أن أصبح حامN	أخذت حمض الفوليك
6093540322	153357312	42	Diploma	المنطقة الشرقية	Rural	5	4	9	N		N	لم نستخدم مانع للحمل	في وقت غير مناسب	لم أكن أنوي أن أحمل	لم كنت أرغب أن أرزق بطفل	لم نناقش مطلقا أن ننجب أطفاN فيما بيننا						لم أفعل أي مما تم ذكره أعNه قبل حملي
6093512171	153357312	26	Secondary school	المنطقة الشرقية	Rural	1	1	0.25	N		y	(دائما نستخدم مانع للحمل , لكنني أعلم ان المانع فشل ( تشقق, تحرك من مكانه, انخلع عن مكانه, لم يعمل, إلخ	جيد, لكنه ليس في الوقت المناسب تماما	لم أكن أنوي أن أحمل	كانت لدي مشاعر مختلطه بأن أرزق بطفل	لم نناقش مطلقا أن ننجب أطفاN فيما بيننا						لم أفعل أي مما تم ذكره أعNه قبل حملي
6093491944	153357312	20	Bachelor		Urban	-	-	-	N		N
6093227663	153357312	35	Bachelor	المنطقة الشرقية	Urban	4	4	1	N		y	لم نستخدم مانع للحمل	في الوقت المناسب	نيتي بالحمل كانت متذبذبة	كانت لدي مشاعر مختلطه بأن أرزق بطفل	أنا وشريكي كنا متفقين على أن أصبح حامN	أخذت حمض الفوليك				بحثت عن نصائح صحية/طبية
6092227267	153357312	27	Bachelor	المنطقة الشرقية	Urban	2	1	1.25	y	6	N	لم نستخدم مانع للحمل	في الوقت المناسب	كنت أنوي أن أحمل	كانت لدي مشاعر مختلطه بأن أرزق بطفل	أنا وشريكي كنا متفقين على أن أصبح حامN	أخذت حمض الفوليك	توقفت أو قللت من التدخين
6091765888	153357312	41	Bachelor	المنطقة الشرقية	Urban	8	3	6	N		N	كنا نستخدم مانع للحمل , لكن ليس في كل الممارسات الحميمية	جيد, لكنه ليس في الوقت المناسب تماما	نيتي بالحمل كانت متذبذبة	كانت لدي مشاعر مختلطه بأن أرزق بطفل	لم نناقش مطلقا أن ننجب أطفاN فيما بيننا						لم أفعل أي مما تم ذكره أعNه قبل حملي
6091585946	153357312	33	Bachelor	المنطقة الشرقية	Urban	3	3	0.5	N		y	لم نستخدم مانع للحمل	في وقت غير مناسب	نيتي بالحمل كانت متذبذبة	لم كنت أرغب أن أرزق بطفل	أنا وشريكي تناقشنا على أن ننجب أطفاN ما بيننا، ولكن لم أوافق أن أصبح حامN						لم أفعل أي مما تم ذكره أعNه قبل حملي
6091527752	153357312	34	Bachelor	الرياض	Urban	1	1	0.416667	N		y	لم نستخدم مانع للحمل	في الوقت المناسب	نيتي بالحمل كانت متذبذبة	كنت أرغب أن أرزق بطفل	أنا وشريكي تناقشنا على أن ننجب أطفاN ما بيننا، ولكن لم أوافق أن أصبح حامN						لم أفعل أي مما تم ذكره أعNه قبل حملي
6091420978	153357312	34	Bachelor	المنطقة الشرقية	Urban	2	2	3	N		N	لم نستخدم مانع للحمل	في الوقت المناسب	كنت أنوي أن أحمل	كنت أرغب أن أرزق بطفل	أنا وشريكي كنا متفقين على أن أصبح حامN	أخذت حمض الفوليك
6091395938	153357312	29	Post graduate	المنطقة الشرقية	Urban	4	3	0.666667	N		y	كنا نستخدم مانع للحمل , لكن ليس في كل الممارسات الحميمية	في الوقت المناسب	لم أكن أنوي أن أحمل	كانت لدي مشاعر مختلطه بأن أرزق بطفل	أنا وشريكي تناقشنا على أن ننجب أطفاN ما بيننا، ولكن لم أوافق أن أصبح حامN	أخذت حمض الفوليك
6091393171	153357312	26	Post graduate	المنطقة الشرقية	Urban	2	2	0.416667	N		y	لم نستخدم مانع للحمل	في الوقت المناسب	كنت أنوي أن أحمل	كنت أرغب أن أرزق بطفل	أنا وشريكي كنا متفقين على أن أصبح حامN				أكلي أصبح صحيا أكثر	بحثت عن نصائح صحية/طبية
6091347940	153357312	28	Bachelor	المنطقة الشرقية	Urban	2	2	2	N		N	كنا نستخدم مانع للحمل , لكن ليس في كل الممارسات الحميمية	في وقت غير مناسب	لم أكن أنوي أن أحمل	لم كنت أرغب أن أرزق بطفل	لم نناقش مطلقا أن ننجب أطفاN فيما بيننا						لم أفعل أي مما تم ذكره أعNه قبل حملي
6091312995	153357312	34	Bachelor	المنطقة الشرقية	Urban	4	4	5	N		y	لم نستخدم مانع للحمل	جيد, لكنه ليس في الوقت المناسب تماما	لم أكن أنوي أن أحمل	لم كنت أرغب أن أرزق بطفل	لم نناقش مطلقا أن ننجب أطفاN فيما بيننا						لم أفعل أي مما تم ذكره أعNه قبل حملي
6091296690	153357312	28	Post graduate	المنطقة الشرقية	Urban	2	2	1	N		N	لم نستخدم مانع للحمل	جيد, لكنه ليس في الوقت المناسب تماما	نيتي بالحمل كانت متذبذبة	كانت لدي مشاعر مختلطه بأن أرزق بطفل	لم نناقش مطلقا أن ننجب أطفاN فيما بيننا						لم أفعل أي مما تم ذكره أعNه قبل حملي
6091288280	153357312	24	Bachelor	المنطقة الشرقية	Urban	1	1	0.333333	N		y	كنا نستخدم مانع للحمل , لكن ليس في كل الممارسات الحميمية	في الوقت المناسب	كنت أنوي أن أحمل	كنت أرغب أن أرزق بطفل	أنا وشريكي كنا متفقين على أن أصبح حامN					بحثت عن نصائح صحية/طبية
6091286742	153357312	28	Bachelor	المنطقة الشرقية	Urban	1	1	2	N		N	لم نستخدم مانع للحمل	في الوقت المناسب	كنت أنوي أن أحمل	كنت أرغب أن أرزق بطفل	أنا وشريكي كنا متفقين على أن أصبح حامN	أخذت حمض الفوليك
6091179414	153357312	24	Bachelor	المنطقة الشرقية	Urban	2	1	2	N		y	لم نستخدم مانع للحمل	في الوقت المناسب	كنت أنوي أن أحمل	كنت أرغب أن أرزق بطفل	أنا وشريكي كنا متفقين على أن أصبح حامN	أخذت حمض الفوليك
6091169786	153357312	41	Secondary school	المنطقة الشرقية	Urban	7	4	3.5	N		N	لم نستخدم مانع للحمل	في الوقت المناسب	كنت أنوي أن أحمل	كنت أرغب أن أرزق بطفل	أنا وشريكي كنا متفقين على أن أصبح حامN						لم أفعل أي مما تم ذكره أعNه قبل حملي
6091153873	153357312	28	Post graduate	المنطقة الشرقية	Urban	1	1	2	N		N	لم نستخدم مانع للحمل	في الوقت المناسب	كنت أنوي أن أحمل	كنت أرغب أن أرزق بطفل	أنا وشريكي كنا متفقين على أن أصبح حامN	أخذت حمض الفوليك			أكلي أصبح صحيا أكثر	بحثت عن نصائح صحية/طبية
6090975481	153357312	34	Bachelor	المنطقة الشرقية	Urban	4	3	2	N		N	كنا نستخدم مانع للحمل , لكن ليس في كل الممارسات الحميمية	جيد, لكنه ليس في الوقت المناسب تماما	لم أكن أنوي أن أحمل	كانت لدي مشاعر مختلطه بأن أرزق بطفل	لم نناقش مطلقا أن ننجب أطفاN فيما بيننا						لم أفعل أي مما تم ذكره أعNه قبل حملي
6090495322	153357312	43	Bachelor	الرياض	Urban	6	6	5	N		N	لم نستخدم مانع للحمل	في وقت غير مناسب	لم أكن أنوي أن أحمل	لم كنت أرغب أن أرزق بطفل	أنا وشريكي تناقشنا على أن ننجب أطفاN ما بيننا، ولكن لم أوافق أن أصبح حامN					بحثت عن نصائح صحية/طبية
6090413556	153357312	26	Bachelor	المنطقة الشرقية	Urban	1	1	0.205479	N		y	لم نستخدم مانع للحمل	في الوقت المناسب	كنت أنوي أن أحمل	كنت أرغب أن أرزق بطفل	أنا وشريكي كنا متفقين على أن أصبح حامN	أخذت حمض الفوليك			أكلي أصبح صحيا أكثر
6090401813	153357312	49	Post graduate	الرياض	Urban	4	3	19	N		N	لم نستخدم مانع للحمل	في الوقت المناسب	كنت أنوي أن أحمل	كنت أرغب أن أرزق بطفل	أنا وشريكي كنا متفقين على أن أصبح حامN	أخذت حمض الفوليك

## Sheet: Sheet1
		The data ID1 and ID2 are only identifying numbers. The data do not contain any identifiers.

## Sheet: Specialist
	Column1	Column2	Column3	Region	Experience	Contraceptive use	Timing	Intention	Having a baby	Partner influence	Preparation
	6090752336	153362903	استشاري أمراض نساء وولادة	Eastern Province	23	4	4	1	2	1	4
	6090092600	153362903	استشاري أمراض نساء وولادة	Eastern Province	25	4	4	4	4	4	4
	6089948356	153362903	طبيب أسرة	Eastern Province	4	4	4	3	3	4	4
	6089752445	153362903	أخصائي أمراض نساء وولادة	Eastern Province	8	4	3	2	4	1	4
	6089205420	153362903	أطبيب مقيم أمراض نساء وولادة	Eastern Province	3	4	4	3	3	1	4
	6089172351	153362903	أخصائي أمراض نساء وولادة	Eastern Province	7	4	4	4	4	4	4
	6087974279	153362903	أطبيب مقيم أمراض نساء وولادة	Eastern Province	2	3	3	4	4	1	2
	6087836905	153362903	أطبيب مقيم أمراض نساء وولادة	Eastern Province	3	4	4	4	4	4	1
	6087770950	153362903	أطبيب مقيم أمراض نساء وولادة	Eastern Province	2	4	4	4	4	4	4
	6087728418	153362903	أطبيب مقيم أمراض نساء وولادة	Eastern Province	2	4	4	4	3	4	4
	Arabic	Key	Value	Meaning
	ليست ذات صلة	Not Relevant	1	0
	ذات صلة قليلا	Slightly relevant	2	0
	ذات صلة	Relevant	3	1
	ذات صلة وثيقة	Totally relevant	4	1
